# Supplementary material for: High-dose versus low-dose haemofiltration for the treatment of critically ill patients with acute kidney injury: an updated systematic review and meta-analysis
Source: PubMed Central journal article supplement — BMJ Open. 2017 Oct 22;7(10):e014171. doi: 10.1136/bmjopen-2016-014171 (PMC5665234; doi:10.1136/bmjopen-2016-014171), 2017-10-22
Supplement: bmjopen-2016-014171.draft_revisions.pdf [file bmjopen-2016-014171.draft_revisions.pdf]

# BMJ Open

## Delivered dose of continuous renal replacement therapy in acute kidney injury of patients in the intensive care unit: an updated systematic review and meta-analysis

|                                 |                                                                                                                                                                                                                                                                                                                                                                                                                                                                                                                                                                                                                                                                                                                                                                                |
|---------------------------------|--------------------------------------------------------------------------------------------------------------------------------------------------------------------------------------------------------------------------------------------------------------------------------------------------------------------------------------------------------------------------------------------------------------------------------------------------------------------------------------------------------------------------------------------------------------------------------------------------------------------------------------------------------------------------------------------------------------------------------------------------------------------------------|
| Journal:                        | <i>BMJ Open</i>                                                                                                                                                                                                                                                                                                                                                                                                                                                                                                                                                                                                                                                                                                                                                                |
| Manuscript ID                   | bmjopen-2016-014171                                                                                                                                                                                                                                                                                                                                                                                                                                                                                                                                                                                                                                                                                                                                                            |
| Article Type:                   | Research                                                                                                                                                                                                                                                                                                                                                                                                                                                                                                                                                                                                                                                                                                                                                                       |
| Date Submitted by the Author:   | 06-Sep-2016                                                                                                                                                                                                                                                                                                                                                                                                                                                                                                                                                                                                                                                                                                                                                                    |
| Complete List of Authors:       | Li , Peng ; YantaiYuhuangding Hospital<br>Qu, Li-ping ; YantaiYuhuangding Hospital, Department of Obstetrics<br>Qi, Dong ; YantaiYuhuangding Hospital, Department of Nephrology<br>Shen, Bo ; Zhongshan Hospital, Shanghai Medical College, Fudan University, Department of Nephrology<br>Wang, Yi-mei ; Zhongshan Hospital, Shanghai Medical College, Fudan University<br>Xu, Jia-rui ; Zhongshan Hospital, Shanghai Medical College, Fudan University<br>Jiang, Wu-hua ; Zhongshan Hospital, Shanghai Medical College, Fudan University, Department of Nephrology<br>Zhang, Hao ; Zhongshan Hospital, Shanghai Medical College, Fudan University<br>Ding, Xiao-qiang ; Zhongshan Hospital, Shanghai Medical College, Fudan University, Department of Nephrology<br>Teng, Jie |
| <b>Primary Subject Heading</b>: | Intensive care                                                                                                                                                                                                                                                                                                                                                                                                                                                                                                                                                                                                                                                                                                                                                                 |
| Secondary Subject Heading:      | Intensive care, Urology                                                                                                                                                                                                                                                                                                                                                                                                                                                                                                                                                                                                                                                                                                                                                        |
| Keywords:                       | acute kidney injury, dose, intensive care unit                                                                                                                                                                                                                                                                                                                                                                                                                                                                                                                                                                                                                                                                                                                                 |
|                                 |                                                                                                                                                                                                                                                                                                                                                                                                                                                                                                                                                                                                                                                                                                                                                                                |

SCHOLARONE™  
Manuscripts

1  
2  
3  
4 **Delivered dose of continuous renal replacement therapy in acute kidney injury of**  
5  
6  
7 **patients in the intensive care unit: an updated systematic review and meta-analysis**  
8  
9

10 **Running title:** Renal replacement therapy in acute kidney injury  
11  
12  
13

14  
15  
16 Peng Li<sup>1\*</sup>M.D., Li-ping Qu<sup>2\*</sup>M.D., Dong Qi<sup>1</sup>M.D., Bo Shen<sup>3,4</sup>M.D., Yi-mei Wang<sup>3,4</sup>M.D.,  
17  
18 Jia-rui Xu<sup>3,4</sup>M.D., Wu-hua Jiang<sup>3,4</sup>M.D., Hao Zhang<sup>3,4</sup>M.D., Xiao-qiang Ding<sup>3,4,5</sup>M.D.,  
19  
20  
21 Jie Teng<sup>3,4,5#</sup>M.D.  
22  
23  
24  
25  
26  
27

28 <sup>1</sup> Department of Nephrology, YantaiYuhuangding Hospital, No. 20 Yuhuangding East  
29  
30 Road, Yantai, Shandong 264000, China.  
31  
32

33 <sup>2</sup> Department of Obstetrics, YantaiYuhuangding Hospital, No. 20 Yuhuangding East  
34  
35 Road, Yantai, Shandong 26400, China.  
36  
37  
38

39 <sup>3</sup> Department of Nephrology, Zhongshan Hospital, Shanghai Medical College, Fudan  
40  
41 University. No 180 Fenglin Road, Shanghai 200032, China.  
42  
43  
44

45 <sup>4</sup>Kidney and Dialysis Institute of Shanghai. No 180 Fenglin Road, Shanghai 200032,  
46  
47 China.  
48  
49

50  
51 <sup>5</sup>Kidney and Blood Purification Laboratory of Shanghai. No 180 Fenglin Road, Shanghai  
52  
53 200032, China.  
54  
55  
56  
57  
58  
59  
60

1  
2  
3  
4 \* Peng Li and Li-ping Qu contributed equally to this manuscript.  
5  
6  
7  
8  
9

10 **#Corresponding author:** Jie Teng  
11

12 Department of Nephrology, Zhongshan Hospital, Shanghai Medical College, Fudan  
13

14 University, No 180 Fenglin Road, Shanghai 200032, China.  
15

16 Tel: +8621-64041990-2970; Fax: +8621-64038472  
17

18 Email: [drtengjie03@163.com](mailto:drtengjie03@163.com)  
19  
20  
21  
22  
23  
24  
25  
26  
27

28 **Word count:** 3482  
29  
30  
31  
32  
33  
34  
35  
36  
37  
38  
39  
40  
41  
42  
43  
44  
45  
46  
47  
48  
49  
50  
51  
52  
53  
54  
55  
56  
57  
58  
59  
60

**ABSTRACT**

**Objective:** The purpose of this study was to conduct a systematic review and meta-analysis to determine the effect of intensity (delivered dose) of continuous renal replacement therapy on the survival of patients and acute renal failure.

**Design:** Meta-analysis.

**Setting:** Included studies were randomized controlled trials, two-arm prospective or retrospective studies.

**Participants:** Critically ill patients with acute kidney injury.

**Interventions:** Continuous renal-replacement therapy.

**Primary and secondary outcome measures:** The major outcomes of death up to 90-days (90 day mortality), Intensive Care Unit (ICU) mortality, hospital mortality, and length of hospital or ICU stay

**Result:** Eight studies were included in the analysis for a total of 2970 patients. For the primary outcomes, patients treated with high-dose continuous renal replacement therapy did not have a higher risk of death than those with low- or standard-dose renal-replacement therapy. There was also no significant difference between the high- or low-intensity renal replacement therapy groups in terms of length of ICU or hospital stay. Sensitivity analysis and quality assessment indicated the findings are robust.

1  
2  
3  
4 **Conclusion:** The study found no survival benefit of high-intensity compared with low- or  
5  
6  
7 standard- intensity continuous renal replacement therapy in critically ill patients with  
8  
9  
10 acute kidney injury.

11  
12  
13 **Keywords:** acute kidney injury, dose, intensive care unit, intensity, renal dialysis, renal-  
14  
15  
16 replacement therapy  
17

### 18 19 20 21 22 **Strengths and limitations of this study**

- 23  
24  
25 ● The strength of our analysis is the meta-regression analysis with evaluated the  
26  
27  
28 impact of patients with sepsis or septic shock on the overall pooled analysis.  
29
- 30  
31 ● The limitation of our analysis is the considerable variation across the studies with  
32  
33  
34 regard to the prescribed doses for the high-, less- intensive CRRT.  
35  
36  
37  
38  
39  
40  
41  
42  
43  
44  
45  
46  
47  
48  
49  
50  
51  
52  
53  
54  
55  
56  
57  
58  
59  
60

## INTRODUCTION

Acute kidney injury (AKI) occurs in at least 5% of patients with who are admitted to the intensive care unit (ICU) and is an independent predictor of mortality.[1-3] In addition, about 50% of patients with septic shock will experience AKI.[4] The prognosis of patients with AKI is low with a mortality rate of up to 70% despite improvements in hemodialysis methodology and availability.[5-7]

Two methods for obtaining clearance in patients with AKI who require renal support are hemofiltration and hemodialysis. Hemofiltration uses convection to aid in the removal of both high and low molecular weight solutes, which is determined by the pore size of the membrane.[8] Hemodialysis removes solute by diffusion out of the bloodstream into the [8] dialysate using a concentration gradient, and removes low molecular weight molecules. Hemodialysis has limited ability to clear high molecular weight substances. The ability of hemofiltration to remove both large and small molecules, which may include toxic mediators of sepsis and inflammation, is thought to be the reason for the superiority of hemofiltration compared with hemodialysis.[8]

A significant percentage of patients with AKI require renal replacement therapy (RRT).[2] For patients who require RRT, the treatment dose or intensity may influence outcomes. Continuous renal replacement therapy (CRRT) is an option for treating patients with AKI and may provide better clearance for toxic molecules, acid-base

1  
2  
3  
4 homeostasis, and removal of inflammatory mediators that can contribute to organ injury  
5  
6  
7 and dysfunction.[9-13] However, the optimum dosage of CRRT, including the ideal  
8  
9  
10 timing and intensity is not clear. Some clinical studies have found benefits for intensive  
11  
12  
13 doses of CRRT in mortality,[14,15] while other have not.[16-19]

14  
15  
16 Several prior systematic reviews and meta-analyses have assessed the use of CRRT  
17  
18  
19 for treating AKI. These studies found that high-dose CRRT was not associated with a  
20  
21  
22 decrease in mortality in patients with AKI.[20-22] Since the publication of these reviews,  
23  
24  
25 additional clinical studies have been published that addressed the use of CRRT in  
26  
27  
28 AKI.[23,24] Hence, we conducted an updated systematic review and meta-analysis to  
29  
30  
31 evaluate the effect of intensity (delivered dose) of CRRT on the survival of patients with  
32  
33  
34 AKI in an ICU setting. This study focuses on patients receiving hemofiltration.  
35  
36  
37  
38  
39  
40  
41

## 42 43 44 45 46 47 48 49 50 51 52 53 54 55 56 57 58 59 60

## MATERIAL AND METHODS

### *Search strategy*

This meta-analysis was performed according to the PRISMA guidelines. PubMed,  
Medline, Cochrane, Google Scholar databases were searched until June 22, 2016 using  
the following search terms: renal-replacement therapy, renal dialysis, acute kidney injury,  
intensive care unit, intensity, dose. Included studies were randomized controlled trials,

1  
2  
3  
4 two-arm prospective, retrospective, or cohort studies that evaluated critically ill patients  
5  
6  
7 with acute kidney injury who received CRRT. Included studies had to report quantitative  
8  
9  
10 outcomes of interest. Letters, comments, editorials, case report, proceeding, and personal  
11  
12  
13 communications were excluded. Studies that evaluated patients who had received  
14  
15  
16 previous renal replacement therapy during the same hospital admission or who were on  
17  
18  
19 maintenance dialysis for end-stage kidney disease were excluded. Two independent  
20  
21  
22 reviewers reviewed all potential studies, and a third reviewer was consulted to resolve  
23  
24  
25 any discrepancies.  
26  
27

### 28 ***Data extraction and quality assessment***

29  
30  
31  
32 The following information/ data were extracted from studies that met the inclusion  
33  
34  
35 criteria: the name of the first author, year of publication, study design, number of  
36  
37  
38 participants in each group, participants' age and gender, and the major outcomes of death  
39  
40  
41 up to 90-days (90 day mortality), Intensive Care Unit (ICU) mortality, hospital mortality,  
42  
43  
44 and length of hospital or ICU stay.  
45

46  
47 The quality of the included studies was evaluated using the Cochran Q and the I<sup>2</sup>  
48  
49  
50 statistic.[25]  
51

### 52 ***Statistical analysis***



1  
2  
3  
4 Primary outcomes were 90-day mortality, ICU mortality, and hospital mortality.  
5  
6  
7 Secondary outcomes were length of ICU and hospital stay. Comparisons of mortality rate  
8  
9  
10 between patients receiving high- or low-intensity CRRT were presented by odds ratio  
11  
12 (OR) and 95% confidence interval (95% CI); an OR > 1 indicated that patient treated  
13  
14 with high intensity CRRT had higher risk of death. The effect size of length of ICU and  
15  
16 hospital stay was reported as difference in means; difference in means > 0 indicated  
17  
18 longer ICU or hospital stay in patients treated with high intensity CRRT. Pooled estimates  
19  
20 for odds ratios and difference in means were calculated by DerSimonian and Laird  
21  
22 random-effects model. A 2-sided P-value < 0.05 was considered statistically significant.  
23  
24  
25  
26  
27  
28  
29

30 Heterogeneity was assessed using the Cochran Q and the  $I^2$  statistic. For the Q  
31  
32 statistic, P < 0.10 was considered statistically significant for heterogeneity. The  $I^2$  statistic  
33  
34 indicates the percentage of the observed between-study variability due to heterogeneity.  
35  
36 The suggested ranges are as follows: no heterogeneity ( $I^2 = 0\%$  to  $25\%$ ), moderate  
37  
38 heterogeneity ( $I^2 = 25\%$  to  $50\%$ ), large heterogeneity ( $I^2 = 50\%$  to  $75\%$ ), and extreme  
39  
40 heterogeneity ( $I^2 = 75\%$  to  $100\%$ ).  
41  
42  
43  
44  
45  
46  
47

48 Sensitivity analysis was performed for the primary outcomes using the leave-one-out  
49  
50 approach. Due to incongruous definition of grouping based on the treatment dose of  
51  
52 CRRT, additional sensitivity analysis was performed to examine the stability of pooled  
53  
54 estimates according to various cut-off points of prescribed dose. Meta-regression analysis  
55  
56  
57  
58  
59  
60

1  
2  
3  
4 was performed to examine whether the percentage of patients with sepsis or septic shock  
5  
6  
7 influenced the pooled estimates of association between CRRT and outcomes of interest.  
8  
9  
10 All analyses were performed using Comprehensive Meta-Analysis statistical software,  
11  
12  
13 version 2.0 (Biostat, Englewood, NJ).  
14  
15  
16  
17  
18  
19

## 20 RESULTS

21  
22  
23 A total of 363 studies were identified in the initial search of which 246 were excluded for  
24  
25  
26 being duplicate publications (Figure 1). Of the remaining 117 studies, 100 were excluded  
27  
28  
29 for not being relevant, and nine more were excluded for not reporting outcomes of  
30  
31  
32 interest, being a duplicate with an included study, or administered intermittent or low  
33  
34  
35 doses of CRRT.  
36  
37

38 Eight studies were included in the meta-analysis.[14,16,17,19,23,24,26,27] Seven  
39  
40  
41 were randomized controlled trials [14,16,17,23,24,26] and one was a prospective study  
42  
43  
44 [27] (Table 1). A total of 2970 patients were included, and the number of patients per  
45  
46  
47 study ranged from 19 to 1465. The mean age ranged from 59 to 73 years, most of the  
48  
49  
50 patients were male (54% to 80%) and the causes for requiring acute kidney injury were  
51  
52  
53 sepsis, surgery (including cardiovascular surgery), and septic shock. The type of  
54  
55  
56 treatment and the definition of high-dose or more-intensive therapy varied across the  
57  
58  
59  
60

1  
2  
3  
4 studies. The doses used also were heterogeneous among the studies, ranging from 20 to  
5  
6  
7 85 mL/kg/h.  
8  
9

### 10 *Meta-analysis*

11  
12  
13  
14 For analysis of the primary outcomes of within 90-day mortality,[14,17,23,24] ICU  
15  
16 mortality,[16,17,19,27] and hospital mortality [16,17,19,24], there was low to moderate  
17  
18 heterogeneity across the studies for each outcome ( $Q = 4.10$ ,  $P = 0.251$ ,  $I^2 = 26.7\%$ ;  $Q =$   
19  
20  $2.24$ ,  $P = 0.524$ ,  $I^2 = 0\%$ ; and  $Q = 1.49$ ,  $P = 0.686$ ,  $I^2 = 0\%$ , respectively). The pooled  
21  
22 results showed no significant difference in the 90-mortality rate between patients treated  
23  
24 with high-volume or more intensive CRRT and those that were not (pooled OR = 0.899,  
25  
26 95% CI = 0.728 to 1.109,  $P = 0.319$ ) (Figure 2A). The findings were similar for ICU  
27  
28 (pooled OR = 1.120, 95% CI = 0.939 to 1.335,  $P = 0.209$ ) and hospital mortality (pooled  
29  
30 OR = 1.025, 95% CI = 0.809 to 1.297,  $P = 0.839$ ) (Figure 2B and 2C).  
31  
32  
33  
34  
35  
36  
37  
38  
39

40  
41 Large heterogeneity was observed across the seven studies that reported data for  
42  
43 length of hospital stay ( $Q=25.10$ ,  $P = 0.002$ ,  $I^2 = 76.1\%$ ). No heterogeneity was observed  
44  
45 for data regarding length of hospital stay ( $Q=1.74$ ,  $P=0.784$ ,  $I^2=0\%$ ). No significant  
46  
47 difference was found in the length of ICU between treatment groups (pooled difference in  
48  
49 means = -2.092, 95% CI = -5.638 to 1.453,  $P = 0.247$ ) (Figure 3A). The results were  
50  
51  
52  
53  
54  
55  
56  
57  
58  
59  
60

1  
2  
3  
4 similar for length of hospital stay (pooled difference in means = -0.034, 95% CI = -2.382  
5  
6  
7 to 2.313, P = 0.977) (Figure 3B).  
8  
9

### 10 *Sensitivity analysis, meta-regression analysis, and quality assessment*

11  
12  
13  
14 Sensitivity analysis using the leave-one-out approach showed that the pooled results for  
15  
16  
17 the 3 primary outcomes did not significantly change when each study was left out in turn.  
18  
19  
20 (Figure 4). Furthermore, use of various cut-off points of prescribed dose to identify  
21  
22  
23 treatment intensity had no significant impact on the results (Table 2). These findings  
24  
25  
26 indicate that the findings are not overly influenced by any one study or different dose cut-  
27  
28  
29 off points, and suggest the findings are robust.  
30  
31

32  
33 We used meta-regression analysis on the population of patients with sepsis or septic  
34  
35  
36 shock to evaluate whether these two population affect the overall pooled analysis. The  
37  
38  
39 reason for the analysis was based on the fact that sepsis and septic shock differ in terms  
40  
41  
42 of emergent setting and presence of systemic infection. The results of meta-regression  
43  
44  
45 analysis showed that the regression coefficients had a slope close to 0, indicating that the  
46  
47  
48 associations between CRRT and selected outcomes were not influenced by the percentage  
49  
50  
51 of patients with sepsis or septic shock (all P-values for all slope coefficients >0.05) (Table  
52  
53  
54 3).  
55  
56  
57  
58  
59  
60

1  
2  
3  
4 Assessment of the quality of the included studies, using Cochrane's collaboration  
5  
6  
7 tool, indicated that there was low risk of bias for most of the studies (Figure 5A and 5B).  
8  
9  
10 One exception was the study of Vesconi et al. [27] which showed a high risk of selection,  
11  
12  
13 performance, and detection bias (Figure 5B). Overall, the included studies were of  
14  
15  
16 adequate quality.  
17  
18  
19  
20  
21  
22

## 23 DISCUSSION

24  
25  
26 The purpose of this study was to conduct a systematic review and meta-analysis to  
27  
28  
29 provide an update meta-analysis on the proper dosage of CRRT and the effect of dose on  
30  
31  
32 mortality, length of hospital stay or stay in the ICU in patients with AKI.. Eight studies  
33  
34  
35 were included in the analysis for a total of 2970 patients. For the primary outcomes,  
36  
37  
38 patients treated with high-intensity CRRT did not have higher risk of death than those  
39  
40  
41 with low dose renal-replacement therapy. There was also no significant difference  
42  
43  
44 between the high- or low-intensity CRRT groups in terms of length of ICU or hospital  
45  
46  
47 stay. Sensitivity analysis and quality assessment indicated no one study dominated the  
48  
49  
50 findings and that the included data was of adequate quality.  
51  
52

53 The study updates the analysis of the impact of high- versus low- intensity CRRT on  
54  
55  
56 survival and hospital/ICU stay in critically ill patients with AKI, and is consistent with  
57  
58  
59  
60

1  
2  
3  
4 the results of three prior meta-analyses, all of which found no survival benefit of high  
5  
6  
7 intensity CRRT in patients with acute renal failure.[20-22] Although, our findings are  
8  
9  
10 similar to prior studies, a strength of our analysis is the meta-regression analysis with  
11  
12  
13 evaluated the impact of patients with sepsis or septic shock on the overall pooled analysis.  
14  
15  
16 The meta-regression analysis indicated that heterogeneity due to a mixed population of  
17  
18  
19 sepsis and septic shock patients did not influenced the pooled results. In addition, we  
20  
21  
22 included two additional studies that updated the analysis compared with prior meta-  
23  
24  
25 analyses. The consistency of finding across the different meta-analyses and findings of  
26  
27  
28 our meta-regression analysis suggest that the delivered dose is not affected by the  
29  
30  
31 presence of systemic infection; and any variance seen when treating patients may reflect  
32  
33  
34 the severity of the acute kidney disease and/or an individual patient's condition.  
35

36  
37 The data from clinical studies on the benefit of high intensity CRRT in critically ill  
38  
39 patients have been inconsistent. Ronco et al (2000) found improved survival associated  
40  
41  
42 with higher total effluent volumes (>45 mL/kg/h) in patients with septic AKI [14] and  
43  
44  
45 Boussekey et al (2008), in a small pilot study, found high intensity CRRT was associated  
46  
47  
48 with improved hemodynamic profile.[26] However, Boussekey et al did not find any  
49  
50  
51 significant effect on survival or organ dysfunction. In contrast, two randomized  
52  
53  
54 controlled multicenter studies found no added survival benefit of high intensity compared  
55  
56  
57 with standard intensity CRRT in critically ill patients with AKI.[17,18] A more recent  
58  
59  
60

1  
2  
3  
4 study by Joannes-Boyau et al also found no evidence that high-intensity (70 mL/kg/h)  
5  
6  
7 compared with standard-intensity (35 ml/kg/h) CRRT resulted in reduction in 28-day  
8  
9  
10 mortality or to early improvements in hemodynamic profile or organ dysfunction in  
11  
12 septic shock patients with AKI.[23] The authors conclude that high-intensity CRRT as  
13  
14 used in their study cannot be recommended for treatment of septic shock complicated by  
15  
16  
17  
18  
19 AKI.[23]

20  
21 A prior meta-analysis compared the efficacy of extended daily dialysis (EDD) and  
22  
23  
24 CCRT in treating patients with acute kidney injury.[28] Zhang et al (2015) included 17  
25  
26  
27 studies from 2000-2014 with a total of 1208 patients. Meta-analysis of the included RCTs  
28  
29  
30 (n=10) found no difference in mortality rates between EDD and CRRT (relative risk, 0.90;  
31  
32  
33 95% CI, 0.74-1.11; P=0.3). However, lower mortality risk was observed with EDD  
34  
35  
36 compared with CRRT in observational studies (relative risk, 0.86; 95% CI, 0.74-1.00;  
37  
38  
39 P=0.05). For both RCTs and observational studies recovery of kidney function, fluid  
40  
41  
42 removal, and days in the ICU were similar between procedures. The authors conclude  
43  
44  
45 that the findings from RCTs suggest that CRRT and EDD have similar efficacy, and that  
46  
47  
48 the difference in mortality observed in analysis of the observational studies may be  
49  
50  
51 confounded by selection bias. The potential confounding effect of observational studies is  
52  
53  
54 also indicated by our findings from our quality assessment of the included studies as the  
55  
56  
57  
58  
59  
60

1  
2  
3  
4 study of Vesconi et al. [27] had a high risk of selection bias, as well as, performance and  
5  
6  
7 detection bias.  
8

9  
10 Our study was limited by the considerable variation across the studies with regard to  
11  
12 the prescribed doses for the high-, less- intensive CRRT. It is difficult to standardize the  
13  
14 prescribed and delivered doses across the studies due to differences in equipment used  
15  
16 and personnel. There was also a wide range of effect size and several of the studies  
17  
18 reported opposite findings. In addition, only four of the included studies reported data for  
19  
20 the primary endpoint of mortality within 90-days, and not all the studies were randomized  
21  
22 controlled trials. In addition, due to the heterogeneity of dosing across studies and the  
23  
24 differences in the definition of high-dose or more-intensive dose, and the fact the raw  
25  
26 data for each group was not presented, it was difficult to group the analysis according to a  
27  
28 cut-off value of the standard of care does of 35 mL/kg/hr. For example, Vesconi et al.  
29  
30 defined 35mL/kg/hr as “more intensive” and compared the finding of that dosing with  
31  
32 “less intensive” <20 to 34 mL/kg/hr. This type of definition differs from that of Zhang et  
33  
34 al. which compared 85 mL/kg/hr with 50 mL/kg/hr. It is highly possible that this  
35  
36 variability may have confounded our results. However, sensitivity analysis found that no  
37  
38 one study overly influences the findings; hence suggesting that although heterogeneity in  
39  
40 dosing exists, the pooled results are robust. Larger numbers of randomized controlled  
41  
42 studies with more consistent dosing are required to further explore the use of high-  
43  
44  
45  
46  
47  
48  
49  
50  
51  
52  
53  
54  
55  
56  
57  
58  
59  
60



1  
2  
3  
4 intensity CRRT in treating critically ill patients with AKI. Investigation of the cost-  
5  
6  
7 effectiveness of the high- and low-intensity CRRT is also warranted.  
8  
9

10  
11 This meta-analysis did not find a survival benefit of high-intensity CRRT compared  
12  
13 with low-intensity CRRT in patients with AKI. It also did not find an association of high-  
14  
15 intensity CRRT with reduced ICU or hospital stay. However, additional well-designed  
16  
17 studies are necessary to further investigate what is the optimal CRRT for critically ill  
18  
19 patients with AKI.  
20  
21  
22  
23  
24  
25  
26  
27  
28  
29

### 30 **Acknowledgements**

31  
32  
33 We would like to express our sincere gratitude to our colleagues whose name did not  
34  
35 appear on the paper but also contributed to the article. We especially thank Xiao Tan, Jifu  
36  
37 Jin and Zhouping Zou for collecting the data.  
38  
39  
40  
41

### 42 **Funding source**

43  
44  
45 Key Project in the National Science & Technology Pillar Program in the Twelfth Five-  
46  
47 year Plan Period (2011BAI10B07); Scientific Research Project of Shanghai Committee  
48  
49 of Science and Technology (12DJ1400201).  
50  
51  
52

53  
54 **Competing interests:** None  
55  
56  
57  
58  
59  
60

**Author's contribution:**

PL: study design, literature research, manuscript preparation; LPQ: study design, literature research, manuscript preparation; DQ: manuscript preparation, data acquisition, data analysis; BS: manuscript preparation, data acquisition, data analysis; YW: manuscript preparation, data acquisition, data analysis; JRX: manuscript preparation, data acquisition, data analysis; WHJ: data analysis, statistical analysis; HZ: data analysis, statistical analysis; XQD: guarantor of integrity of the entire study, study concepts; JT: study concepts, study design, guarantor of integrity of the entire, study, manuscript editing

**Ethics approval:** This article does not contain any studies with human participants or animals performed by any of the authors.

**Informed Consent:** Not applicable

**Data sharing statement:** No additional data available

**REFERENCES**

1. Metnitz PG, Krenn CG, Steltzer H, et al. Effect of acute renal failure requiring renal replacement therapy on outcome in critically ill patients. *Crit Care Med* 2002;30:2051-8.
2. Uchino S, Kellum JA, Bellomo R, et al. Acute renal failure in critically ill patients: a multinational, multicenter study. *JAMA* 2005;294:813-8.
3. Uchino S, Bellomo R, Goldsmith D, et al. An assessment of the RIFLE criteria for acute renal failure in hospitalized patients. *Crit Care Med* 2006;34:1913-7.
4. Bagshaw SM, Uchino S, Bellomo R, et al. Timing of renal replacement therapy and clinical outcomes in critically ill patients with severe acute kidney injury. *J Crit Care* 2009;24:129-40.
5. Keir I, Kellum JA. Acute kidney injury in severe sepsis: pathophysiology, diagnosis, and treatment recommendations. *J Vet Emerg Crit Care (San Antonio)* 2015;25:200-9.
6. Kellum JA, Angus DC. Patients are dying of acute renal failure. *Crit Care Med* 2002;30:2156-7.
7. Srisawat N, Kellum JA. Acute kidney injury: definition, epidemiology, and outcome. *Curr Opin Crit Care* 2011;17:548-55.
8. Depner TA. "Artificial" hemodialysis versus "natural" hemofiltration. *Am J Kidney Dis* 2008;52:403-406.

- 1  
2  
3  
4 9. Bellomo R, Tipping P, Boyce N. Continuous veno-venous hemofiltration with  
5  
6 dialysis removes cytokines from the circulation of septic patients. *Crit Care Med*  
7  
8 1993;21:522-6.  
9
- 10  
11  
12 10. Heering P, Morgera S, Schmitz FJ, et al. Cytokine removal and cardiovascular  
13  
14 hemodynamics in septic patients with continuous venovenous hemofiltration.  
15  
16 *Intensive Care Med* 1997;23:288-96.  
17  
18
- 19  
20  
21 11. Hoffmann JN, Hartl WH, Deppisch R, et al. Effect of hemofiltration on  
22  
23 hemodynamics and systemic concentrations of anaphylatoxins and cytokines in  
24  
25 human sepsis. *Intensive Care Med* 1996;22:1360-7.  
26  
27  
28
- 29  
30  
31 12. Honore PM, Joannes-Boyau O. High volume hemofiltration (HVHF) in sepsis: a  
32  
33 comprehensive review of rationale, clinical applicability, potential indications and  
34  
35 recommendations for future research. *Int J Artif Organs* 2004;27:1077-82.  
36  
37  
38
- 39  
40  
41 13. Rimmele T, Kellum JA. High-volume hemofiltration in the intensive care unit: a  
42  
43 blood purification therapy. *Anesthesiology* 2012;116:1377-87.  
44
- 45  
46  
47 14. Ronco C, Bellomo R, Homel P, et al. Effects of different doses in continuous veno-  
48  
49 venous haemofiltration on outcomes of acute renal failure: a prospective randomised  
50  
51 trial. *Lancet* 2000;356:26-30.  
52  
53
- 54  
55  
56 15. Saudan P, Niederberger M, De Seigneux S, et al. Adding a dialysis dose to  
57  
58 continuous hemofiltration increases survival in patients with acute renal failure.  
59  
60

1  
2  
3  
4 *Kidney Int* 2006;70:1312-7.  
5  
6

- 7  
8  
9  
10  
11  
12  
13  
14  
15  
16  
17  
18  
19  
20  
21  
22  
23  
24  
25  
26  
27  
28  
29  
30  
31  
32  
33  
34  
35  
36  
37  
38  
39  
40  
41  
42  
43  
44  
45  
46  
47  
48  
49  
50  
51  
52  
53  
54  
55  
56  
57  
58  
59  
60
16. Bouman CS, Oudemans-Van Straaten HM, Tijssen JG, et al. Effects of early high-volume continuous venovenous hemofiltration on survival and recovery of renal function in intensive care patients with acute renal failure: a prospective, randomized trial. *Crit Care Med* 2002;30:2205-11.
17. The RENAL Replacement Therapy Study Investigators: Bellomo R, Cass A, Cole L, et al. Intensity of continuous renal-replacement therapy in critically ill patients. *N Engl J Med* 2009;361:1627-38.
18. Network VNARFT, Palevsky PM, Zhang JH, et al. Intensity of renal support in critically ill patients with acute kidney injury. *N Engl J Med* 2008;359:7-20.
19. Tolwani AJ, Campbell RC, Stofan BS, et al. Standard versus high-dose CVVHDF for ICU-related acute renal failure. *J Am Soc Nephrol* 2008;19:1233-8.
20. Casey ET, Gupta BP, Erwin PJ, et al. The dose of continuous renal replacement therapy for acute renal failure: a systematic review and meta-analysis. *Ren Fail* 2010;32:555-61.
21. Negash DT, Dhingra VK, Copland M, et al. Intensity of continuous renal replacement therapy in acute kidney injury in the intensive care unit: a systematic review and meta-analysis. *Vasc Endovascular Surg* 2011;45:504-10.
22. Van Wert R, Friedrich JO, Scales DC, et al. High-dose renal replacement therapy for

1  
2  
3  
4 acute kidney injury: Systematic review and meta-analysis. *Crit Care Med*  
5  
6  
7 2010;38:1360-9.

8  
9  
10 23. Joannes-Boyau O, Honore PM, Perez P, et al. High-volume versus standard-volume  
11  
12 haemofiltration for septic shock patients with acute kidney injury (IVOIRE study): a  
13  
14 multicentre randomized controlled trial. *Intensive Care Med* 2013;39:1535-46.

15  
16  
17 24. Zhang P, Yang Y, Lv R, et al. Effect of the intensity of continuous renal replacement  
18  
19 therapy in patients with sepsis and acute kidney injury: a single-center randomized  
20  
21 clinical trial. *Nephrol Dial Transplant* 2012;27:967-73.

22  
23  
24 25. Higgins JPT. Cochrane Collaboration Handbook for Systematic Reviews of  
25  
26 Interventions Version 5.1.0. The Cochrane Collaboration, 2011.  
27  
28 Available:www.cochrane-handbook.org.

29  
30  
31 26. Boussekey N, Chiche A, Faure K, et al. A pilot randomized study comparing high  
32  
33 and low volume hemofiltration on vasopressor use in septic shock. *Intensive Care*  
34  
35 *Med* 2008;34:1646-53.

36  
37  
38 27. Vesconi S, Cruz DN, Fumagalli R, et al. Delivered dose of renal replacement therapy  
39  
40 and mortality in critically ill patients with acute kidney injury. *Crit Care*  
41  
42 2009;13:R57.

43  
44  
45 28. Zhang L, Yang J, Eastwood GM, et al. Extended Daily Dialysis Versus Continuous  
46  
47 Renal Replacement Therapy for Acute Kidney Injury: A Meta-analysis. *Am J Kidney*  
48  
49

1  
2  
3  
4 *Dis* 2015; 66(2):322-30.  
5  
6  
7  
8  
9  
10  
11  
12  
13  
14  
15  
16  
17  
18  
19  
20  
21  
22  
23  
24  
25  
26  
27  
28  
29  
30  
31  
32  
33  
34  
35  
36  
37  
38  
39  
40  
41  
42  
43  
44  
45  
46  
47  
48  
49  
50  
51  
52  
53  
54  
55  
56  
57  
58  
59  
60

For peer review only

**FIGURE LEGENDS**

**Figure 1.** PRISMA flow diagram

**Figure 2.** Meta-analysis for treatment effect of continuous renal replacement therapy on mortality (A) within 90 days, (B) in ICU and (C) in hospital

**Figure 3.** Meta-analysis for treatment effect of continuous renal replacement therapy on (A) ICU stay and (B) hospital stay.

**Figure 4.** Sensitivity analysis using leave-one-out approach for treatment effect of continuous renal replacement therapy on mortality (A) within 90 days, (B) in ICU and (C) in hospital.

**Figure 5.** Quality assessment.



Table 1. Summary of basic characteristics of included studies for meta-analysis

| Study                | Study design | No of patients | Treatment dose        | Prescribed dose (mL/kg/h) | Delivered Dose (mL/kg/h)* | Duration (days)*     | Age (yrs)*    | Male (%) | Major cause of AKI | Sepsis                 | Oliguria |
|----------------------|--------------|----------------|-----------------------|---------------------------|---------------------------|----------------------|---------------|----------|--------------------|------------------------|----------|
| Joannes-Boyau (2013) | RCT          | 66             | High-volume HF        | 70                        | 65.6 (40–67.9)*           | 96 hrs               | 68 (58–77)*   | 68.0%    | Sepsis             | 66 (100%)              |          |
|                      |              | 71             | Standard-volume HF    | 35                        | 33.2 (28.7–33.6)*         |                      | 70 (58–75)*   | 54.0%    |                    | 71 (100%)              |          |
| Vesconi (2009)       | Prospective  | 75             | More-intensive        | 35                        | 44.8 (9.4)                | 2 (1, 3)*            | 61.01 (17.4)  | 58.1%    | Surgery            | 33 (40.5%) 36 (48.6%)  |          |
|                      |              | 202            | Less-intensive        | 21-34                     | 26.9 (4.0)                | 4 (2, 8)*            | 63.48 (15.9)  | 67.8%    |                    | 81 (40.1%) 84 (41.7%)  |          |
|                      |              | 61             | Less-intensive        | 20                        | 15.4 (4.2)                | 3 (2, 6)*            | 59.05 (19.0)  | 73.8%    |                    | 19 (31.2%) 30 (49.5%)  |          |
| Zhang (2012)         | RCT          | 141            | EHVHF                 | 85                        | 87.54 (12.54)             | 9.38 (12. 06)        | 56.62 (16.38) | 58.9%    | Septic shock       | 72 (51.06%)            |          |
|                      |              | 139            | HVHF                  | 50                        | 49.99 (9.65)              | 8.88 (10.79)         | 59.96 (18.81) | 64.0%    |                    | 69 (49.64%)            |          |
| Bouman (2002)        | RCT          | 35             | EHV                   | 72                        | 48.2 (42.3–58.7)*         | 68.5 (28.0–140.8)*,† | 68 (13)       | 60.0%    | Cardiosurgery      | 35 (100%)              |          |
|                      |              | 35             | ELV                   | 24-36                     | 20.1 (17.5–22.0)*         | 94.0 (53.0–181.5)*,† | 70 (10)       | 57.0%    |                    | 35 (100%)              |          |
|                      |              | 36             | LLV                   | 24-36                     | 19.0 (16.6–21.2)*         | 69.5 (28.3–157.7)*,† | 67 (13)       | 61.0%    |                    | 30 (100%)              |          |
| Tolwani (2008)       | RCT          | 100            | High Dosage           | 35                        | 29                        | 10.0 (9.8)           | 58 (16)       | 59.0%    | Septic shock       | 54 (54%) 64 (64%)      |          |
|                      |              | 100            | Standard Dosage       | 20                        | 17                        | 9.7 (11.3)           | 62 (15)       | 57.0%    |                    | 54 (54%) 63 (63%)      |          |
| Bellomo (2009)       | RCT          | 722            | Higher-Intensity CRRT | 40                        | 33.4 (12.8)               | 6.3 (8.7)            | 64.7(14.5)    | 65.7%    | Sepsis             | 360 (49.9) 430 (59.6%) |          |
|                      |              | 743            | Lower-Intensity CRRT  | 25                        | 22 (17.8)                 | 5.9 (7.7)            | 64.4 (15.3)   | 63.5%    |                    | 363 (48.9) 444 (59.8%) |          |
| Boussekey (2008)     | RCT          | 9              | HVHF                  | 65                        | 62                        | 7 (2–17)*            | 68 (58–74)*   | 78.0%    | Sepsis             | 9 (100%)               |          |
|                      |              | 10             | LVHF                  | 35                        | 32                        | 6 (2–14)*            | 72.5 (54–77)* | 80.0%    |                    | 10 (100%)              |          |
| Ronco (2000)         | RCT          | 146            |                       | 20                        |                           |                      | 61 (10)       | 55.5%    | Surgery            | 20 (14%)               |          |
|                      |              | 139            |                       | 35                        |                           |                      | 59 (9)        | 55.4%    |                    | 17 (12%)               |          |
|                      |              | 140            |                       | 45                        |                           |                      | 63 (12)       | 57.1%    |                    | 15 (11%)               |          |

CRRT, continuous renal-replacement therapy; EHV, early high-volume hemofiltration; EHVHF, extra high-volume hemofiltration; ELV, early low-volume hemofiltration; HVHF, high-volume hemofiltration; LLV, late low-volume hemofiltration LVHF, low-volume hemofiltration; RCT, randomized controlled trials,

**Table 2. Sensitivity-analysis for treatment effect on mortality according to different cut-off point for prescribed dose**

|                                     | Number of studies included | Pooled odds ratio | Lower limit | Upper limit | Z-Value | P-Value |
|-------------------------------------|----------------------------|-------------------|-------------|-------------|---------|---------|
| <b>(A) Mortality within 90 days</b> |                            |                   |             |             |         |         |
| 50 mL/kg/h                          | 2                          | 0.969             | 0.655       | 1.434       | -0.156  | 0.876   |
| 40 mL/kg/h                          | 3                          | 0.831             | 0.500       | 1.382       | -0.712  | 0.476   |
| 30 mL/kg/h                          | 2                          | 0.729             | 0.385       | 1.381       | -0.970  | 0.332   |
| <b>(B) ICU mortality</b>            |                            |                   |             |             |         |         |
| 40 mL/kg/h                          | 2                          | 1.039             | 0.845       | 1.278       | 0.365   | 0.715   |
| 30 mL/kg/h                          | 3                          | 1.129             | 0.922       | 1.382       | 1.175   | 0.240   |
| <b>(C) Hospital mortality</b>       |                            |                   |             |             |         |         |
| 50 mL/kg/h                          | 2                          | 1.112             | 0.751       | 1.647       | 0.532   | 0.595   |
| 40 mL/kg/h                          | 2                          | 1.015             | 0.709       | 1.453       | 0.080   | 0.936   |
| 30 mL/kg/h                          | 2                          | 0.978             | 0.728       | 1.314       | -0.145  | 0.884   |

**Table 3. Meta-regression analysis for each outcome**

| <b>Outcomes</b>          | <b>Intercept<sup>a</sup></b> | <b>Slope<sup>a</sup></b> |
|--------------------------|------------------------------|--------------------------|
| Mortality within 90 days | -0.416 (0.191)               | 0.007 (0.004)            |
| ICU mortality            | 0.306 (0.346)                | -0.004 (0.007)           |
| Hospital mortality       | 0.305 (0.344)                | -0.006 (0.007)           |
| Length of ICU stay       | -2.889 (1.901)               | 0.030 (0.038)            |
| Length of hospital stay  | -1.739 (4.133)               | 0.035 (0.081)            |

<sup>a</sup>Presented as point estimate of coefficient and standard error.

For peer review only

1  
2  
3  
4  
5  
6  
7  
8  
9  
10  
11  
12  
13  
14  
15  
16  
17  
18  
19  
20  
21  
22  
23  
24  
25  
26  
27  
28  
29  
30  
31  
32  
33  
34  
35  
36  
37  
38  
39  
40  
41  
42  
43  
44  
45  
46  
47  
48  
49  
50  
51  
52  
53  
54  
55  
56  
57  
58  
59  
60

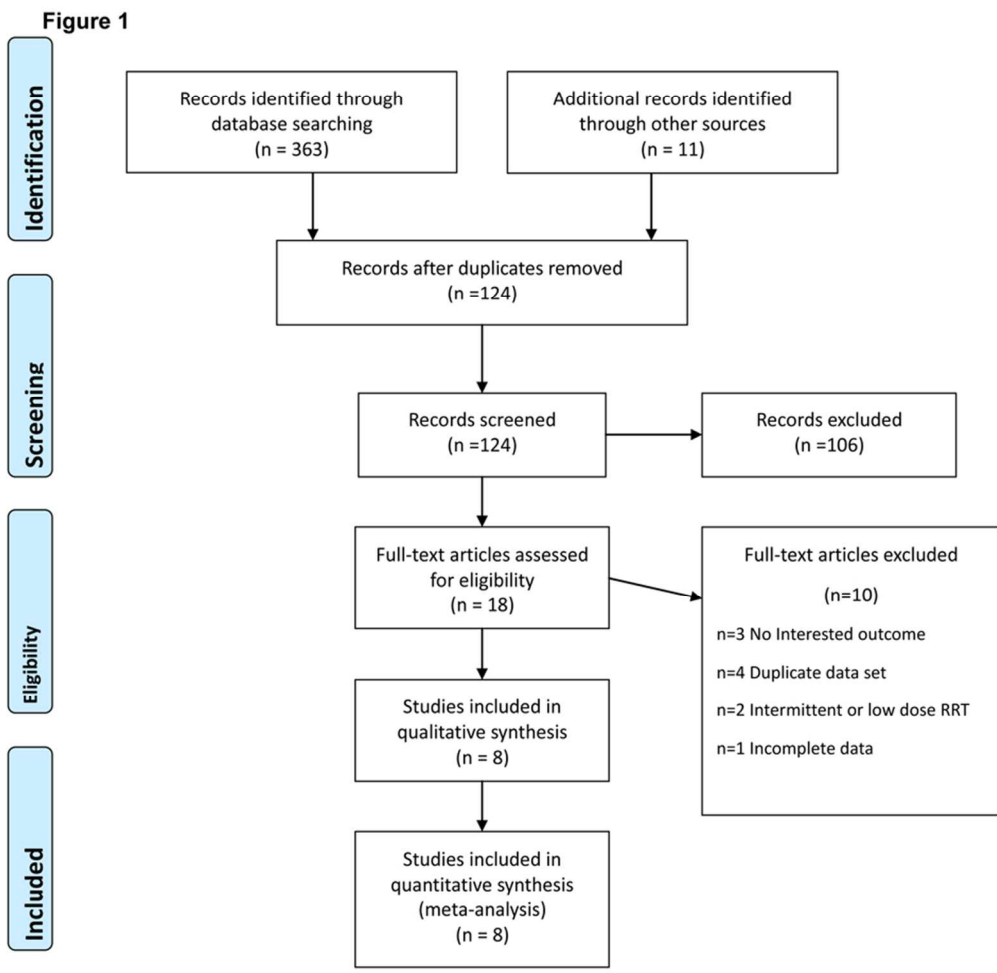

Figure 1

80x79mm (300 x 300 DPI)

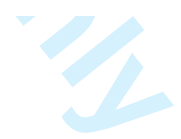

(A) 90-day mortality

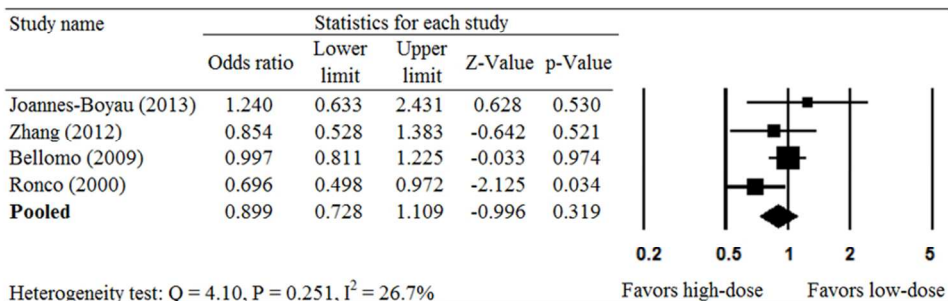

(B) ICU mortality

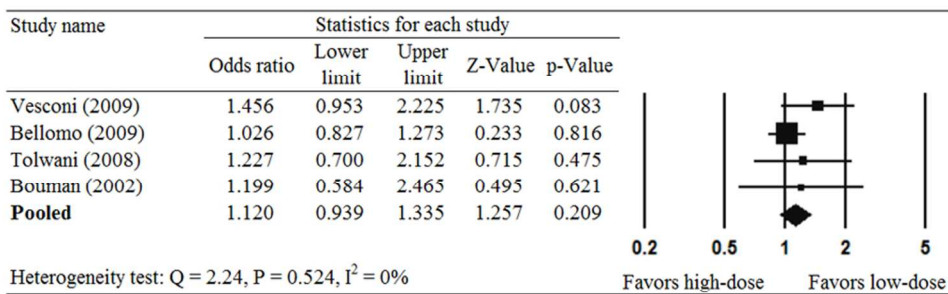

(C) Hospital mortality

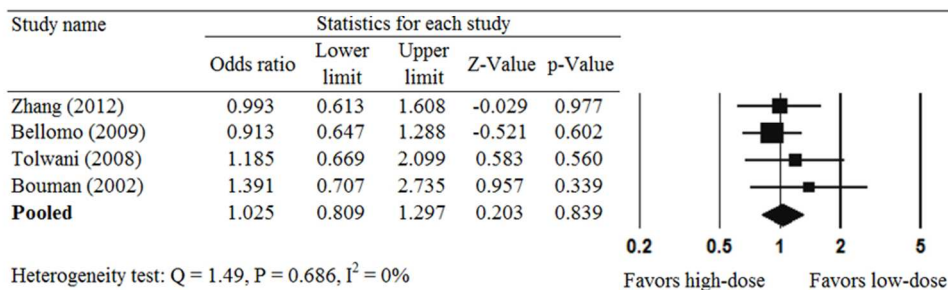

Figure 2

80x94mm (300 x 300 DPI)

## (A) Length of ICU stay

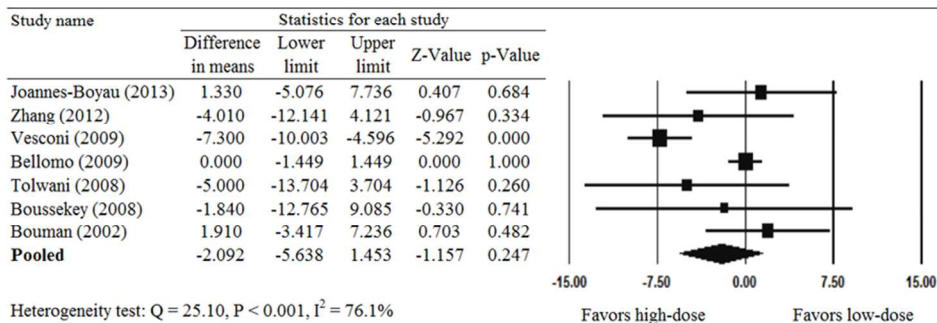

## (B) Length of hospital stay

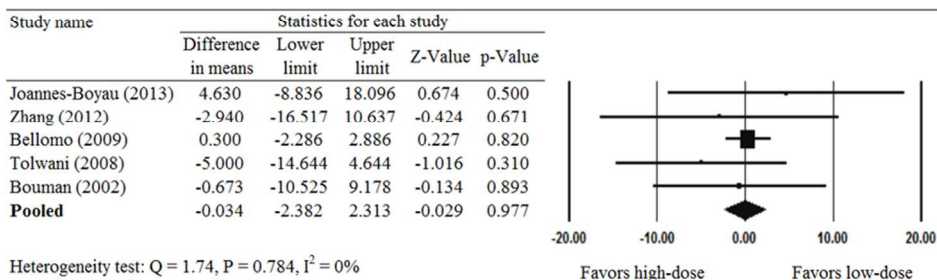

Figure 3

80x64mm (300 x 300 DPI)

(A) 90-day mortality

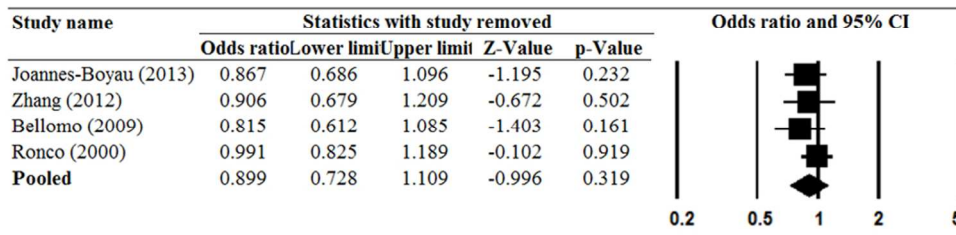

(B) ICU mortality

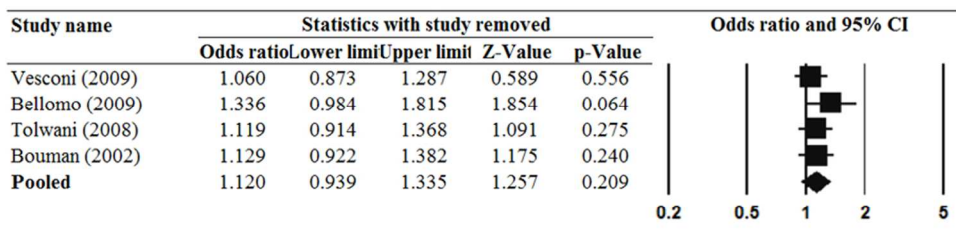

(C) Hospital mortality

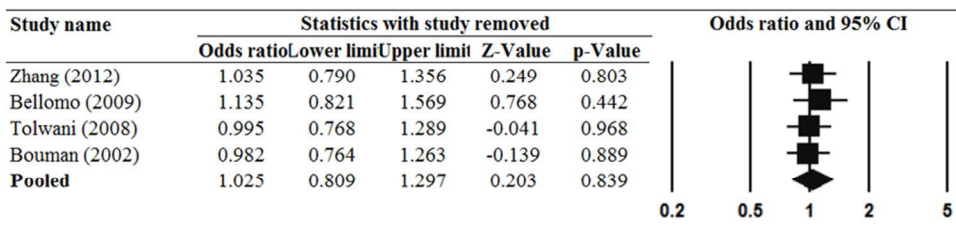

Figure 4

80x80mm (300 x 300 DPI)

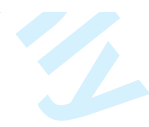

1  
2  
3  
4  
5  
6  
7  
8  
9  
10  
11  
12  
13  
14  
15  
16  
17  
18  
19  
20  
21  
22  
23  
24  
25  
26  
27  
28  
29  
30  
31  
32  
33  
34  
35  
36  
37  
38  
39  
40  
41  
42  
43  
44  
45  
46  
47  
48  
49  
50  
51  
52  
53  
54  
55  
56  
57  
58  
59  
60

Figure 5

(A)

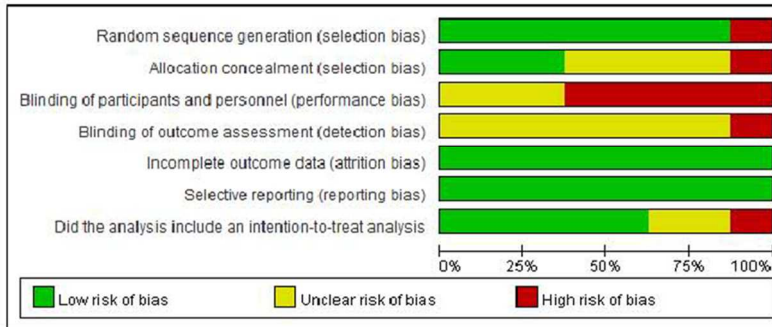

(B)

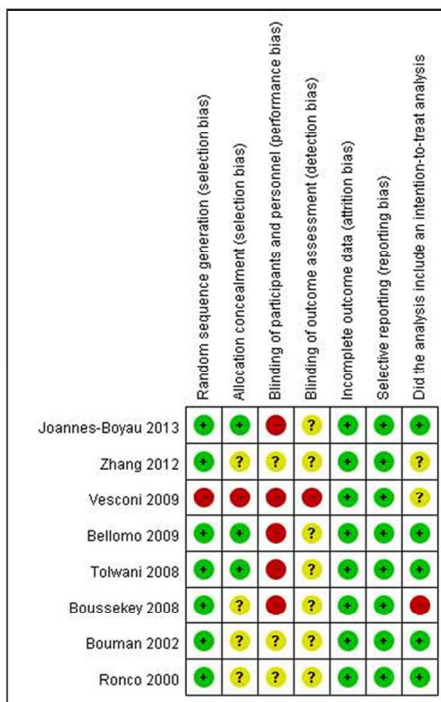

Figure 5

80x113mm (300 x 300 DPI)



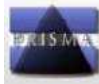

# PRISMA 2009 Checklist

| Section/Topic                      | #  | Checklist Item                                                                                                                                                                                                                                                                                              | Reported on Page # |
|------------------------------------|----|-------------------------------------------------------------------------------------------------------------------------------------------------------------------------------------------------------------------------------------------------------------------------------------------------------------|--------------------|
| <b>TITLE</b>                       |    |                                                                                                                                                                                                                                                                                                             |                    |
| Title                              | 1  | Identify the report as a systematic review, meta-analysis, or both.                                                                                                                                                                                                                                         | 1                  |
| <b>ABSTRACT</b>                    |    |                                                                                                                                                                                                                                                                                                             |                    |
| Structured summary                 | 2  | Provide a structured summary including, as applicable: background; objectives; data sources; study eligibility criteria, participants, and interventions; study appraisal and synthesis methods; results; limitations; conclusions and implications of key findings; systematic review registration number. | 3                  |
| <b>INTRODUCTION</b>                |    |                                                                                                                                                                                                                                                                                                             |                    |
| Rationale                          | 3  | Describe the rationale for the review in the context of what is already known.                                                                                                                                                                                                                              | 5-6                |
| Objectives                         | 4  | Provide an explicit statement of questions being addressed with reference to participants, interventions, comparisons, outcomes, and study design (PICOS).                                                                                                                                                  | 6                  |
| <b>METHODS</b>                     |    |                                                                                                                                                                                                                                                                                                             |                    |
| Protocol and registration          | 5  | Indicate if a review protocol exists, if and where it can be accessed (e.g., Web address), and, if available, provide registration information including registration number.                                                                                                                               |                    |
| Eligibility criteria               | 6  | Specify study characteristics (e.g., PICOS, length of follow-up) and report characteristics (e.g., years considered, language, publication status) used as criteria for eligibility, giving rationale.                                                                                                      | 6-7                |
| Information sources                | 7  | Describe all information sources (e.g., databases with dates of coverage, contact with study authors to identify additional studies) in the search and date last searched.                                                                                                                                  | 6-7                |
| Search                             | 8  | Present full electronic search strategy for at least one database, including any limits used, such that it could be repeated.                                                                                                                                                                               |                    |
| Study selection                    | 9  | State the process for selecting studies (i.e., screening, eligibility, included in systematic review, and, if applicable, included in the meta-analysis).                                                                                                                                                   | 7                  |
| Data collection process            | 10 | Describe method of data extraction from reports (e.g., piloted forms, independently, in duplicate) and any processes for obtaining and confirming data from investigators.                                                                                                                                  | 7                  |
| Data items                         | 11 | List and define all variables for which data were sought (e.g., PICOS, funding sources) and any assumptions and simplifications made.                                                                                                                                                                       | 7                  |
| Risk of bias in individual studies | 12 | Describe methods used for assessing risk of bias of individual studies (including specification of whether this was done at the study or outcome level), and how this information is to be used in any data synthesis.                                                                                      | 7                  |
| Summary measures                   | 13 | State the principal summary measures (e.g., risk ratio, difference in means).                                                                                                                                                                                                                               | 8                  |
| Synthesis of results               | 14 | Describe the methods of handling data and combining results of studies, if done, including measures of consistency (e.g., $I^2$ for each meta-analysis).                                                                                                                                                    | 8                  |

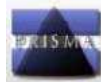

# PRISMA 2009 Checklist

Page 1 of 2

| Section/Topic                 | #  | Checklist Item                                                                                                                                                                                           | Reported on Page # |
|-------------------------------|----|----------------------------------------------------------------------------------------------------------------------------------------------------------------------------------------------------------|--------------------|
| Risk of bias across studies   | 15 | Specify any assessment of risk of bias that may affect the cumulative evidence (e.g., publication bias, selective reporting within studies).                                                             |                    |
| Additional analyses           | 16 | Describe methods of additional analyses (e.g., sensitivity or subgroup analyses, meta-regression), if done, indicating which were pre-specified.                                                         | 8-9                |
| <b>RESULTS</b>                |    |                                                                                                                                                                                                          |                    |
| Study selection               | 17 | Give numbers of studies screened, assessed for eligibility, and included in the review, with reasons for exclusions at each stage, ideally with a flow diagram.                                          | 9                  |
| Study characteristics         | 18 | For each study, present characteristics for which data were extracted (e.g., study size, PICOS, follow-up period) and provide the citations.                                                             | 9                  |
| Risk of bias within studies   | 19 | Present data on risk of bias of each study and, if available, any outcome level assessment (see item 12).                                                                                                | 12                 |
| Results of individual studies | 20 | For all outcomes considered (benefits or harms), present, for each study: (a) simple summary data for each intervention group (b) effect estimates and confidence intervals, ideally with a forest plot. |                    |
| Synthesis of results          | 21 | Present the main results of the review. If meta-analyses done, include for each, confidence intervals and measures of consistency.                                                                       | 10-11              |
| Risk of bias across studies   | 22 | Present results of any assessment of risk of bias across studies (see Item 15).                                                                                                                          |                    |
| Additional analysis           | 23 | Give results of additional analyses, if done (e.g., sensitivity or subgroup analyses, meta-regression [see Item 16]).                                                                                    | 11                 |
| <b>DISCUSSION</b>             |    |                                                                                                                                                                                                          |                    |
| Summary of evidence           | 24 | Summarize the main findings including the strength of evidence for each main outcome; consider their relevance to key groups (e.g., healthcare providers, users, and policy makers).                     | 12-15              |
| Limitations                   | 25 | Discuss limitations at study and outcome level (e.g., risk of bias), and at review-level (e.g., incomplete retrieval of identified research, reporting bias).                                            | 15-16              |
| Conclusions                   | 26 | Provide a general interpretation of the results in the context of other evidence, and implications for future research.                                                                                  | 16                 |
| <b>FUNDING</b>                |    |                                                                                                                                                                                                          |                    |
| Funding                       | 27 | Describe sources of funding for the systematic review and other support (e.g., supply of data); role of funders for the systematic review.                                                               | 16                 |

From: Moher D, Liberati A, Tetzlaff J, Altman DG, The PRISMA Group (2009). Preferred Reporting Items for Systematic Reviews and Meta-Analyses: The PRISMA Statement. PLoS Med 6(6): e1000097. doi:10.1371/journal.pmed1000097

For more information, visit: [www.prisma-statement.org](http://www.prisma-statement.org).

For peer review only - <http://bmjopen.bmj.com/site/about/guidelines.xhtml>

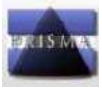

# PRISMA 2009 Checklist

Page 2 of 2

For peer review only

1  
2  
3  
4  
5  
6  
7  
8  
9  
10  
11  
12  
13  
14  
15  
16  
17  
18  
19  
20  
21  
22  
23  
24  
25  
26  
27  
28  
29  
30  
31  
32  
33  
34  
35  
36  
37  
38  
39  
40  
41  
42  
43  
44  
45  
46  
47  
48  
49

# BMJ Open

## High- vs. low-dose hemofiltration for the treatment of critically ill patients with acute kidney injury: an updated systematic review and meta-analysis

|                                 |                                                                                                                                                                                                                                                                                                                                                                                                                                                                                                                                                                                                                                                                                                                                                                                |
|---------------------------------|--------------------------------------------------------------------------------------------------------------------------------------------------------------------------------------------------------------------------------------------------------------------------------------------------------------------------------------------------------------------------------------------------------------------------------------------------------------------------------------------------------------------------------------------------------------------------------------------------------------------------------------------------------------------------------------------------------------------------------------------------------------------------------|
| Journal:                        | <i>BMJ Open</i>                                                                                                                                                                                                                                                                                                                                                                                                                                                                                                                                                                                                                                                                                                                                                                |
| Manuscript ID                   | bmjopen-2016-014171.R1                                                                                                                                                                                                                                                                                                                                                                                                                                                                                                                                                                                                                                                                                                                                                         |
| Article Type:                   | Research                                                                                                                                                                                                                                                                                                                                                                                                                                                                                                                                                                                                                                                                                                                                                                       |
| Date Submitted by the Author:   | 24-Feb-2017                                                                                                                                                                                                                                                                                                                                                                                                                                                                                                                                                                                                                                                                                                                                                                    |
| Complete List of Authors:       | Li , Peng ; YantaiYuhuangding Hospital<br>Qu, Li-ping ; YantaiYuhuangding Hospital, Department of Obstetrics<br>Qi, Dong ; YantaiYuhuangding Hospital, Department of Nephrology<br>Shen, Bo ; Zhongshan Hospital, Shanghai Medical College, Fudan University, Department of Nephrology<br>Wang, Yi-mei ; Zhongshan Hospital, Shanghai Medical College, Fudan University<br>Xu, Jia-rui ; Zhongshan Hospital, Shanghai Medical College, Fudan University<br>Jiang, Wu-hua ; Zhongshan Hospital, Shanghai Medical College, Fudan University, Department of Nephrology<br>Zhang, Hao ; Zhongshan Hospital, Shanghai Medical College, Fudan University<br>Ding, Xiao-qiang ; Zhongshan Hospital, Shanghai Medical College, Fudan University, Department of Nephrology<br>Teng, Jie |
| <b>Primary Subject Heading</b>: | Intensive care                                                                                                                                                                                                                                                                                                                                                                                                                                                                                                                                                                                                                                                                                                                                                                 |
| Secondary Subject Heading:      | Intensive care, Urology                                                                                                                                                                                                                                                                                                                                                                                                                                                                                                                                                                                                                                                                                                                                                        |
| Keywords:                       | acute kidney injury, dose, intensive care unit                                                                                                                                                                                                                                                                                                                                                                                                                                                                                                                                                                                                                                                                                                                                 |

SCHOLARONE™  
Manuscripts

1  
2  
3 **High- vs. low-dose hemofiltration for the treatment of critically ill patients with**  
4 **acute kidney injury: an updated systematic review and meta-analysis**  
5  
6

7 **Running title:** Hemofiltration in acute kidney injury  
8  
9

10  
11  
12  
13 Peng Li<sup>1\*</sup>M.D., Li-ping Qu<sup>2\*</sup>M.D., Dong Qi<sup>1</sup>M.D., Bo Shen<sup>3,4</sup>M.D., Yi-mei  
14 Wang<sup>3,4</sup>M.D., Jia-rui Xu<sup>3,4</sup>M.D., Wu-hua Jiang<sup>3,4</sup>M.D., Hao Zhang<sup>3,4</sup>M.D., Xiao-qiang  
15 Ding<sup>3,4,5</sup>M.D., Jie Teng<sup>3,4,5#</sup>M.D.  
16  
17  
18  
19  
20  
21  
22  
23

24 <sup>1</sup> Department of Nephrology, Yantai Yuhuangding Hospital, No. 20 Yuhuangding East  
25 Road, Yantai, Shandong 264000, China  
26  
27

28  
29 <sup>2</sup> Department of Obstetrics, Yantai Yuhuangding Hospital, No. 20 Yuhuangding East  
30 Road, Yantai, Shandong 26400, China  
31  
32  
33

34  
35 <sup>3</sup> Department of Nephrology, Zhongshan Hospital, Shanghai Medical College, Fudan  
36 University. No 180 Fenglin Road, Shanghai 200032, China  
37  
38

39  
40 <sup>4</sup> Kidney and Dialysis Institute of Shanghai, No 180 Fenglin Road, Shanghai 200032,  
41 China  
42  
43  
44

45  
46 <sup>5</sup> Kidney and Blood Purification Laboratory of Shanghai, No 180 Fenglin Road, Shanghai  
47 200032, China  
48  
49

50  
51  
52  
53  
54 \* Peng Li and Li-ping Qu contributed equally to this manuscript.  
55  
56  
57  
58  
59  
60

1  
2  
3 **#Corresponding author:** Jie Teng  
4

5 Department of Nephrology, Zhongshan Hospital, Shanghai Medical College, Fudan  
6

7 University, No 180 Fenglin Road, Shanghai 200032, China  
8

9  
10 Tel: +8621-64041990-2970; Fax: +8621-64038472  
11

12 Email: [teng.jie@zs-hospital.sh.cn](mailto:teng.jie@zs-hospital.sh.cn)  
13

14  
15  
16  
17  
18  
19  
20 **Word count: 2645**  
21  
22  
23  
24  
25  
26  
27  
28  
29  
30  
31  
32  
33  
34  
35  
36  
37  
38  
39  
40  
41  
42  
43  
44  
45  
46  
47  
48  
49  
50  
51  
52  
53  
54  
55  
56  
57  
58  
59  
60

**ABSTRACT**

**Objective:** The purpose of this study was to perform a systematic review and meta-analysis to evaluate the effect of high-vs. low-dose hemofiltration on the survival of critically ill patients with acute kidney injury (AKI). We hypothesized that high-dose treatments are not associated with a higher risk of mortality.

**Design:** Meta-analysis.

**Setting:** Randomized controlled trials, and two-arm prospective and retrospective studies were included.

**Participants:** Critically ill patients with AKI.

**Interventions:** Continuous renal-replacement therapy.

**Primary and secondary outcome measures:** Primary outcomes: 90-day mortality, intensive care unit (ICU) mortality, hospital mortality; secondary outcomes: length of ICU and hospital stay.

**Result:** Eight studies including 2,970 patients were included in the analysis. Pooled results showed no significant difference in the 90-mortality rate between patients treated with high- or low-dose hemofiltration (pooled odds ratio [OR] = 0.899, 95% confidence interval [CI]: 0.728 to 1.109, P = 0.319). Findings were similar for ICU (pooled OR = 1.120, 95% CI: 0.939 to 1.335, P = 0.209) and hospital mortality (pooled OR = 1.025, 95% CI: 0.809 to 1.297, P = 0.839). Length of ICU and hospital stay were similar between high- and low-dose groups. Pooled results are not overly influenced by any one study, different cut-off points of prescribed dose, or different cut-off points of delivered dose. Meta-regression analysis indicated that the results were not affected by the percentage of patients with sepsis or septic shock.

1  
2  
3 **Conclusion:** High- and low-dose hemofiltration produce similar outcomes with respect to  
4 mortality and length of ICU and hospital stay in critically ill patients with AKI.  
5  
6  
7  
8  
9

10 The study is registered at <http://www.researchregistry.com/>, registration number  
11 reviewregistry211.  
12  
13

14 **Keywords:** acute kidney injury, dose, intensive care unit, intensity, renal dialysis, renal-  
15 replacement therapy  
16  
17  
18  
19

### 20 21 **Strengths and limitations of this study** 22

- 23 • The strengths of this study are the inclusion of the most current literature,  
24 and the meta-regression analysis which evaluated the impact of patients with  
25 sepsis or septic shock on the overall pooled analysis.  
26  
27
- 28 • The limitation of this analysis is the considerable variation across the  
29 studies with regard to the prescribed doses for the high- and low-dose  
30 hemofiltration.  
31  
32  
33  
34  
35  
36  
37  
38  
39  
40  
41  
42  
43  
44  
45  
46  
47  
48  
49  
50  
51  
52  
53  
54  
55  
56  
57  
58  
59  
60



## INTRODUCTION

Acute kidney injury (AKI) occurs in at least 5% of patients with who are admitted to the intensive care unit (ICU), and is an independent predictor of mortality.[1-3] In addition, about 50% of patients with septic shock will experience AKI.[4] The prognosis of patients with AKI is low, with a mortality rate of up to 70% despite improvements in hemodialysis and availability.[5-7]

Two methods for obtaining clearance in patients with AKI who require renal support are hemofiltration and hemodialysis. Hemofiltration uses convection to aid in the removal of middle molecular weight solutes, which is determined by the pore size of the membrane.[8] Hemofiltration is superior to hemodialysis in patients with AKI as it is believed that it can remove the toxic mediators of sepsis and inflammation.[8]

For patients who require RRT, the treatment dose or intensity may influence outcomes. Continuous renal replacement therapy (CRRT) in the form of hemofiltration is an option for treating patients with AKI, and may provide better clearance of toxic molecules, acid-base homeostasis, and removal of inflammatory mediators that can contribute to organ injury and dysfunction than other methods.[9-13] However, the optimum dosage of hemofiltration, including the ideal timing and dose is not clear. Some studies have reported benefits with intensive doses of CRRT with respect to mortality,[14,15] while others have not.[16-19]

Several prior systematic reviews and meta-analyses have assessed the use of CRRT for treating AKI. These studies found that high-dose CRRT was not associated with a decrease in mortality in patients with AKI.[20-22] Since the publication of these reviews, additional clinical studies have been published that addressed the use of CRRT in

1  
2  
3 AKI.[23,24] Prior reviews have addressed both hemofiltration and hemodialysis, which  
4  
5 may not provide sufficient data with respect to either method.  
6  
7

8 Thus, the purpose of this study was to perform a systematic review and meta-analysis  
9  
10 to evaluate the effect of high-vs. low-dose hemofiltration on the survival of critically ill  
11  
12 patients with AKI. We hypothesized that high-dose treatments are not associated with a  
13  
14 higher risk of mortality.  
15  
16

## 17 18 19 20 **MATERIAL AND METHODS**

### 21 22 *Search strategy*

23  
24 This meta-analysis was performed according to the PRISMA guidelines. The study is  
25  
26 registered at <http://www.researchregistry.com/>, and the registration number is  
27  
28 reviewregistry211.  
29  
30

31  
32 PubMed, Medline, Cochrane, Google Scholar databases were searched until June 22,  
33  
34 2016 using the following search terms: renal-replacement therapy, renal dialysis, acute  
35  
36 kidney injury, intensive care unit, intensity, dose. Included studies were randomized  
37  
38 controlled trials (RCTs), two-arm prospective, retrospective, or cohort studies that  
39  
40 evaluated critically ill patients with AKI who received hemofiltration. Included studies  
41  
42 had to report quantitative outcomes of interest. Letters, comments, editorials, case  
43  
44 reports, proceeding, and personal communications were excluded. Studies that evaluated  
45  
46 patients who had received previous RRT during the same hospital admission or who were  
47  
48 on maintenance dialysis for end-stage kidney disease were excluded. The database  
49  
50 searches were performed by two independent (two of the authors) reviewers. The authors  
51  
52 independently reviewed all potential studies, and extracted data of interest. A third  
53  
54  
55  
56  
57  
58  
59  
60

1  
2  
3 reviewer was consulted to resolve any questions regarding inclusion of studies or data in  
4  
5 the analysis, and a decision was arrived at by consensus.  
6  
7  
8  
9

### 10 ***Data extraction and quality assessment***

11  
12 The following information/ data were extracted from studies that met the inclusion  
13  
14 criteria: the name of the first author, year of publication, study design, number of  
15  
16 participants in each group, participants' age and gender, and the major outcomes of death  
17  
18 up to 90-days (90 day mortality), ICU mortality, hospital mortality, and length of hospital  
19  
20 or ICU stay.  
21  
22  
23

24 The quality of the included studies was evaluated using the Cochran Risk of Bias tool  
25  
26 outlined in the Cochrane Collaboration Handbook for Systematic Reviews of  
27  
28 Interventions Version 5.1.0.[25]  
29  
30  
31  
32  
33

### 34 ***Statistical analysis***

35  
36 Primary outcomes were 90-day mortality, ICU mortality, and hospital mortality.  
37  
38 Secondary outcomes were length of ICU and hospital stay. Comparisons of the different  
39  
40 mortality rates between patients receiving high- or low-dose hemofiltration were  
41  
42 presented by odds ratio (OR) and 95% confidence interval (95% CI); an OR > 1 indicated  
43  
44 that patients treated with high-intensity hemofiltration had a higher risk of death. The  
45  
46 effect size of length of ICU and hospital stay was reported as difference in means; a  
47  
48 difference in means > 0 indicated longer ICU or hospital stay in patients treated with  
49  
50 high-dose hemofiltration. Pooled estimates for odds ratios and difference in means were  
51  
52  
53  
54  
55  
56  
57  
58  
59  
60

1  
2  
3 calculated using the DerSimonian and Laird random-effects model. A 2-sided P-value <  
4  
5 0.05 was considered statistically significant.  
6  
7

8 Heterogeneity was assessed using the Cochran Q and the  $I^2$  statistic. For the Q  
9  
10 statistic,  $P < 0.10$  was considered statistically significant for heterogeneity. The  $I^2$  statistic  
11  
12 indicates the percentage of the observed between-study variability due to heterogeneity.  
13  
14 The suggested ranges are as follows: no heterogeneity ( $I^2 = 0\%$  to  $25\%$ ), moderate  
15  
16 heterogeneity ( $I^2 = 25\%$  to  $50\%$ ), large heterogeneity ( $I^2 = 50\%$  to  $75\%$ ), and extreme  
17  
18 heterogeneity ( $I^2 = 75\%$  to  $100\%$ ).  
19  
20  
21

22 Sensitivity analysis was performed for the primary outcomes using the leave-one-  
23  
24 out approach. Due to various definitions of high- and low-dose hemofiltration between  
25  
26 the studies, additional sensitivity analysis was performed to examine the stability of  
27  
28 pooled estimates according to various cut-off points of prescribed dose as well as the  
29  
30 actual delivered dose. Meta-regression analysis was performed to examine whether the  
31  
32 percentage of patients with sepsis or septic shock influenced the pooled estimates of the  
33  
34 associations between hemofiltration and outcomes of interest. All analyses were  
35  
36 performed using Comprehensive Meta-Analysis statistical software, version 2.0 (Biostat,  
37  
38 Englewood, NJ).  
39  
40  
41  
42  
43  
44  
45

## 46 RESULTS

47  
48 A total of 374 studies were identified in the initial search, of which 250 were excluded for  
49  
50 being duplicate publications (Figure 1). Of the remaining 124 studies, 106 were excluded  
51  
52 for not being relevant by review of title and/or abstract. The remaining 18 full-text  
53  
54  
55  
56  
57  
58  
59  
60

1  
2  
3 articles were examined, and 10 were excluded, the reasons for which are shown in Figure  
4  
5  
6 1. Thus, eight studies were included in the meta-analysis.[14,16,17,19,23,24,26,27]  
7

8 Of the eight studies, seven were RCTs [14,16,17,23,24,26] and one was a prospective  
9  
10 study [27] (Table 1). A total of 2,970 patients were included, and the number of patients  
11  
12 per study ranged from 19 to 1465. The mean patient age ranged from 59 to 73 years, over  
13  
14 half of the patients were male (54% to 80%), and the causes for of AKI requiring RRT  
15  
16 were sepsis, surgery (including cardiovascular surgery), and septic shock. Six of the eight  
17  
18 studies reported mean APACHE II or III scores for the groups studied, and the mean  
19  
20 scores were similar between the groups in the individual studies. The type of treatment,  
21  
22 and the definition of high-dose or more-intensive therapy varied across the studies. The  
23  
24 doses used also varied, ranging from 20 to 85 mL/kg/h.  
25  
26  
27  
28  
29  
30  
31

### 32 *Meta-analysis*

33  
34 Results of meta-analysis of the primary outcomes of within 90-day mortality,[14,17,23,24]  
35  
36 ICU mortality,[16,17,19,27] and hospital mortality [16,17,19,24] are presented in Figure  
37  
38 2. or low-dose hemofiltration mortality, There was low to moderate heterogeneity  
39  
40 across the studies for each outcome ( $Q = 4.10$ ,  $P = 0.251$ ,  $I^2 = 26.7\%$ ;  $Q = 2.24$ ,  $P =$   
41  
42  $0.524$ ,  $I^2 = 0\%$ ; and  $Q = 1.49$ ,  $P = 0.686$ ,  $I^2 = 0\%$ , respectively).  
43  
44  
45

46 No significant difference was found in the length of ICU stay between patients  
47  
48 who received high- vs. low-dose treatment (pooled difference in means = -2.092, 95% CI  
49  
50 = -5.638 to 1.453,  $P = 0.247$ ) (Figure 2D). However, large heterogeneity was observed  
51  
52 across the seven studies that reported data for length of ICU stay ( $Q=25.10$ ,  $P = 0.002$ ,  $I^2$   
53  
54 = 76.1%). The results were similar for length of hospital stay (pooled difference in means  
55  
56 = 76.1%). The results were similar for length of hospital stay (pooled difference in means  
57  
58  
59  
60

1  
2  
3 = -0.034, 95% CI = -2.382 to 2.313, P = 0.977); however, no heterogeneity was observed  
4  
5 for data regarding length of hospital stay (Q = 1.74, P = 0.784, I<sup>2</sup> = 0%) (Figure 2E).  
6  
7  
8  
9

### 10 *Sensitivity analysis, meta-regression analysis, and quality assessment*

11  
12 Sensitivity analysis was performed in several ways. First, we used the leave-one-out  
13 approach to examine whether any single study influenced the pooled results of primary  
14 outcomes. The pooled results for the three primary outcomes did not significantly change  
15 when each study was removed in turn (Figure 3). Second, the use of various cut-off  
16 points of prescribed dose might minimize the influence of the various definitions of high-  
17 and low-dose in the included studies. Analysis indicated that the results were stable  
18 regardless of cut-off points of prescribed dose. Furthermore, we also performed analyses  
19 for the actual delivered dose with the same cut-off points, and the statistical significance  
20 was consistent when delivered dose was used in the analysis (Table 2). Taken together,  
21 these findings indicate that the pooled results are not overly influenced by any one study,  
22 different cut-off points of prescribed dose, or different cut-off points of delivered dose.  
23  
24  
25  
26  
27  
28  
29  
30  
31  
32  
33  
34  
35  
36  
37

38  
39 Meta-regression analysis was performed to examine whether patients with sepsis or  
40 septic shock affected the overall pooled analysis. The reason for the analysis was based  
41 on the fact that sepsis and septic shock differ in terms of blood pressure instability and  
42 possible emergent death. The results showed that the regression coefficients had a slope  
43 close to 0, indicating that the associations between RRT and selected outcomes were not  
44 influenced by the percentage of patients with sepsis or septic shock (P-values for all slope  
45 coefficients > 0.05) (Table 3).  
46  
47  
48  
49  
50  
51  
52  
53  
54  
55  
56  
57  
58  
59  
60

1  
2  
3 Assessment of the quality of the included studies using the Cochran Risk of Bias tool  
4 indicated that there was low risk of bias for most of the studies (Figure S1A and S1B).  
5  
6 One exception was the study of Vesconi et al., [27] which showed a high risk of selection,  
7  
8 performance, and detection bias (Figure S1B). Overall, the included studies were of  
9  
10 adequate quality.  
11  
12

13  
14  
15 Publication bias assessment was not performed due to limited number of included  
16  
17 studies; 10 or more studies are necessary to assess publication bias.[28]  
18  
19

## 20 21 22 **DISCUSSION** 23

24 The purpose of this study was to conduct a systematic review and meta-analysis to  
25  
26 examine the effect of hemofiltration dosage on mortality, length of hospital stay, and  
27  
28 length of ICU stay in patients with AKI. For all outcomes examined, there was no  
29  
30 difference between patients who received high- vs. low-dose hemofiltration. The results  
31  
32 were consistent when the analyses used prescribed or delivered dose, and not influenced  
33  
34 by the percentage of patients with sepsis or septic shock. Sensitivity analysis and quality  
35  
36 assessment indicated no one study dominated the results, and that the included data was  
37  
38 of adequate quality.  
39  
40  
41  
42

43 There results of this study are consistent with three prior meta-analyses, all of which  
44  
45 found no survival benefit, or increased mortality, of high-dose CRRT in patients with  
46  
47 acute renal failure.[20-22] Although, our findings are similar to prior studies, a strength  
48  
49 of our analysis is the meta-regression analysis with evaluated the impact of patients with  
50  
51 sepsis or septic shock on the overall pooled analysis. The meta-regression analysis  
52  
53 indicated that heterogeneity due to a mixed population of sepsis and septic shock patients  
54  
55  
56  
57  
58  
59  
60

1  
2  
3 did not influence the pooled results. In addition, we included two additional studies that  
4  
5 were not included in the prior meta-analyses. The consistency of finding across the  
6  
7 different meta-analyses, and findings of our meta-regression analysis, suggest that the  
8  
9 delivered dose is not affected by the presence of systemic infection, and any variance  
10  
11 seen when treating patients may reflect the severity of the acute kidney disease and/or an  
12  
13 individual patient's condition.  
14  
15

16  
17 The data from clinical studies on the benefit of high-dose hemofiltration in critically  
18  
19 ill patients have been inconsistent. In 2000 Ronco et al.[14] reported improved survival  
20  
21 with higher total effluent volumes (> 45 mL/kg/h) in patients with septic AKI , and in  
22  
23 2008, in a small pilot study, Boussekey et al.[26] found that high dose RRT was  
24  
25 associated with an improved hemodynamic profile. However, that study did not find any  
26  
27 significant effect on survival or organ dysfunction. In contrast, two randomized  
28  
29 controlled multicenter studies found no added survival benefit of high-dose compared  
30  
31 with standard-dose CRRT in critically ill patients with AKI.[17,18] A more recent study  
32  
33 by Joannes-Boyau et al.[23] also found no evidence that high-dose (70 mL/kg/h)  
34  
35 compared with standard-dose (35 ml/kg/h) RRT resulted in reduction in 28-day mortality,  
36  
37 or to early improvements in hemodynamic profile or organ dysfunction in septic shock  
38  
39 patients with AKI.[23]  
40  
41  
42  
43  
44

45  
46 A prior meta-analysis compared the efficacy of extended daily dialysis (EDD) and  
47  
48 CCRT in treating patients with acute kidney injury. Zhang et al.[29] included 17 studies  
49  
50 from 2000-2014 with a total of 1,208 patients. Meta-analysis of the included RCTs (n =  
51  
52 10) found no difference in mortality rates between EDD and CRRT (relative risk, 0.90;  
53  
54 95% CI, 0.74-1.11; P = 0.3). However, lower mortality risk was observed with EDD  
55  
56  
57  
58  
59  
60



1  
2  
3 compared with CRRT in observational studies (relative risk, 0.86; 95% CI, 0.74-1.00;  
4  
5 P=0.05). For both RCTs and observational studies, recovery of kidney function, fluid  
6  
7 removal, and days in the ICU were similar between procedures. The authors concluded  
8  
9 that the findings from RCTs suggest that CRRT and EDD have similar efficacy, and that  
10  
11 the difference in mortality observed in the analysis of the observational studies may be  
12  
13 confounded by selection bias. The potential confounding effect of observational studies is  
14  
15 also indicated by our quality assessment of the included studies which indicated that the  
16  
17 observational study of Vesconi et al.[27] had a high risk of selection bias, as well as  
18  
19 performance and detection bias.  
20  
21  
22  
23

24  
25 The current analysis focused on hemofiltration. However, hemodialysis is also used to  
26  
27 treat patients with AKI. Friedrich et al.[30] performed a meta-analysis in 2012 that  
28  
29 included 19 RCTs that focused on the difference between hemofiltration and  
30  
31 hemodialysis with similar doses. They found weak evidence supporting the increased  
32  
33 clearance of medium to large molecules by hemofiltration compared to hemodialysis, but  
34  
35 there was no difference in mortality between the two methods. No dose comparison was  
36  
37 performed in their study.  
38  
39  
40

41  
42 Our study was limited by the considerable variation across the studies with regard to  
43  
44 the prescribed doses for high- and low-dose hemofiltration. It is difficult to standardize  
45  
46 the prescribed and delivered doses across the studies due to differences in equipment used  
47  
48 and personnel. There was also a wide range of effect size, and several of the studies  
49  
50 reported opposite findings. In addition, only four of the included studies reported data for  
51  
52 the primary endpoint of mortality within 90-days, and not all the studies were RCTs. In  
53  
54 addition, due to the heterogeneity of dosing across studies, the differences in the  
55  
56  
57  
58  
59  
60

1  
2  
3 definition of high-dose, and the fact that the raw data for each group was not presented, it  
4  
5 was difficult to group the analysis according to a cut-off value of the standard of care  
6  
7 dose of 35 mL/kg/hr. For example, Vesconi et al.[27] defined 35mL/kg/h as “more  
8  
9 intensive” and compared the finding of that dosing with “less intensive” < 20 to 34  
10  
11 mL/kg/h. This differ, for example, of the study by Zhang et al.[29] which compared 85  
12  
13 mL/kg/h with 50 mL/kg/hr. It is highly possible that this variability may have confounded  
14  
15 our results. However, sensitivity analysis found that no one study overly influences the  
16  
17 findings; thus suggesting that although heterogeneity in dosing was present, the pooled  
18  
19 results are robust. In addition, six of the eight studies reported mean APACHE II or III  
20  
21 scores for the groups studied, and the mean scores were similar between the groups in the  
22  
23 individual studies, indicating that the illness severity was similar between the groups in  
24  
25 each of these six studies. Subgroup analyses of different covariates, such as according to  
26  
27 renal function, would aid in the analysis; however, due to limited availability of raw data  
28  
29 few variables can be investigated. Lastly, our original intention was to perform a meta-  
30  
31 analysis examining the outcomes of using different doses of renal replacement therapy  
32  
33 and during our initial literature search we included all modalities of CRRT. However, we  
34  
35 found that the majority of studies that compared different dosages used hemofiltration  
36  
37 rather than other modalities. For this reason we limited the analysis to hemofiltration.  
38  
39

40  
41 This results of this meta-analysis found that mortality rates and length of ICU and  
42  
43 hospital stay were not different between critically ill patients with AKI who received  
44  
45 high- or low-dose hemofiltration. However, additional well-designed studies are  
46  
47 necessary to further investigate what is the optimal CRRT for critically ill patients with  
48  
49 AKI.  
50  
51  
52  
53  
54  
55  
56  
57  
58  
59  
60

**Acknowledgements**

We would like to express our sincere gratitude to our colleagues whose names did not appear as authors, but also contributed to the study. We especially thank Xiao Tan, Jifu Jin, and Zhouping Zou for collecting the data.

**Funding source**

Key Project in the National Science & Technology Pillar Program in the Twelfth Five-year Plan Period (2011BAI10B07); Scientific Research Project of Shanghai Committee of Science and Technology (12DJ1400201).

**Competing interests:** None

**Author contributions:**

PL: study design, literature research, manuscript preparation; LPQ: study design, literature research, manuscript preparation; DQ: manuscript preparation, data acquisition, data analysis; BS: manuscript preparation, data acquisition, data analysis; YW: manuscript preparation, data acquisition, data analysis; JRX: manuscript preparation, data acquisition, data analysis; WHJ: data analysis, statistical analysis; HZ: data analysis, statistical analysis; XQD: guarantor of integrity of the entire study, study concepts; JT: study concepts, study design, guarantor of integrity of the entire, study, manuscript editing

**Ethics approval:** Meta-analyses do not require ethical approval as no experiments on humans or animals are performed.

**Informed Consent:** Not applicable

1  
2  
3 **Data sharing statement:** No additional data available  
4  
5  
6  
7  
8  
9  
10  
11  
12  
13  
14  
15  
16  
17  
18  
19  
20  
21  
22  
23  
24  
25  
26  
27  
28  
29  
30  
31  
32  
33  
34  
35  
36  
37  
38  
39  
40  
41  
42  
43  
44  
45  
46  
47  
48  
49  
50  
51  
52  
53  
54  
55  
56  
57  
58  
59  
60

For peer review only

## REFERENCES

1. Metnitz PG, Krenn CG, Steltzer H, et al. Effect of acute renal failure requiring renal replacement therapy on outcome in critically ill patients. *Crit Care Med* 2002;30:2051-8.
2. Uchino S, Kellum JA, Bellomo R, et al. Acute renal failure in critically ill patients: a multinational, multicenter study. *JAMA* 2005;294:813-8.
3. Uchino S, Bellomo R, Goldsmith D, et al. An assessment of the RIFLE criteria for acute renal failure in hospitalized patients. *Crit Care Med* 2006;34:1913-7.
4. Bagshaw SM, Uchino S, Bellomo R, et al. Timing of renal replacement therapy and clinical outcomes in critically ill patients with severe acute kidney injury. *J Crit Care* 2009;24:129-40.
5. Keir I, Kellum JA. Acute kidney injury in severe sepsis: pathophysiology, diagnosis, and treatment recommendations. *J Vet Emerg Crit Care (San Antonio)* 2015;25:200-9.
6. Kellum JA, Angus DC. Patients are dying of acute renal failure. *Crit Care Med* 2002;30:2156-7.
7. Srisawat N, Kellum JA. Acute kidney injury: definition, epidemiology, and outcome. *Curr Opin Crit Care* 2011;17:548-55.
8. Depner TA. "Artificial" hemodialysis versus "natural" hemofiltration. *Am J Kidney Dis* 2008;52:403-406.
9. Bellomo R, Tipping P, Boyce N. Continuous veno-venous hemofiltration with dialysis removes cytokines from the circulation of septic patients. *Crit Care*

1  
2  
3  
4  
5  
6  
7  
8  
9  
10  
11  
12  
13  
14  
15  
16  
17  
18  
19  
20  
21  
22  
23  
24  
25  
26  
27  
28  
29  
30  
31  
32  
33  
34  
35  
36  
37  
38  
39  
40  
41  
42  
43  
44  
45  
46  
47  
48  
49  
50  
51  
52  
53  
54  
55  
56  
57  
58  
59  
60

*Med* 1993;21:522-6.

10. Heering P, Morgera S, Schmitz FJ, et al. Cytokine removal and cardiovascular hemodynamics in septic patients with continuous venovenous hemofiltration. *Intensive Care Med* 1997;23:288-96.

11. Hoffmann JN, Hartl WH, Deppisch R, et al. Effect of hemofiltration on hemodynamics and systemic concentrations of anaphylatoxins and cytokines in human sepsis. *Intensive Care Med* 1996;22:1360-7.

12. Honore PM, Joannes-Boyau O. High volume hemofiltration (HVHF) in sepsis: a comprehensive review of rationale, clinical applicability, potential indications and recommendations for future research. *Int J Artif Organs* 2004;27:1077-82.

13. Rimmele T, Kellum JA. High-volume hemofiltration in the intensive care unit: a blood purification therapy. *Anesthesiology* 2012;116:1377-87.

14. Ronco C, Bellomo R, Homel P, et al. Effects of different doses in continuous veno-venous haemofiltration on outcomes of acute renal failure: a prospective randomised trial. *Lancet* 2000;356:26-30.

15. Saudan P, Niederberger M, De Seigneux S, et al. Adding a dialysis dose to continuous hemofiltration increases survival in patients with acute renal failure. *Kidney Int* 2006;70:1312-7.

16. Bouman CS, Oudemans-Van Straaten HM, Tijssen JG, et al. Effects of early high-volume continuous venovenous hemofiltration on survival and recovery of renal function in intensive care patients with acute renal failure: a prospective, randomized trial. *Crit Care Med* 2002;30:2205-11.

1  
2  
3  
4  
5  
6  
7  
8  
9  
10  
11  
12  
13  
14  
15  
16  
17  
18  
19  
20  
21  
22  
23  
24  
25  
26  
27  
28  
29  
30  
31  
32  
33  
34  
35  
36  
37  
38  
39  
40  
41  
42  
43  
44  
45  
46  
47  
48  
49  
50  
51  
52  
53  
54  
55  
56  
57  
58  
59  
60

17. The RENAL Replacement Therapy Study Investigators: Bellomo R, Cass A, Cole L, et al. Intensity of continuous renal-replacement therapy in critically ill patients. *N Engl J Med* 2009;361:1627-38.

18. Network VNARFT, Palevsky PM, Zhang JH, et al. Intensity of renal support in critically ill patients with acute kidney injury. *N Engl J Med* 2008;359:7-20.

19. Tolwani AJ, Campbell RC, Stofan BS, et al. Standard versus high-dose CVVHDF for ICU-related acute renal failure. *J Am Soc Nephrol* 2008;19:1233-8.

20. Casey ET, Gupta BP, Erwin PJ, et al. The dose of continuous renal replacement therapy for acute renal failure: a systematic review and meta-analysis. *Ren Fail* 2010;32:555-61.

21. Negash DT, Dhingra VK, Copland M, et al. Intensity of continuous renal replacement therapy in acute kidney injury in the intensive care unit: a systematic review and meta-analysis. *Vasc Endovascular Surg* 2011;45:504-10.

22. Van Wert R, Friedrich JO, Scales DC, et al. High-dose renal replacement therapy for acute kidney injury: Systematic review and meta-analysis. *Crit Care Med* 2010;38:1360-9.

23. Joannes-Boyau O, Honore PM, Perez P, et al. High-volume versus standard-volume haemofiltration for septic shock patients with acute kidney injury (IVOIRE study): a multicentre randomized controlled trial. *Intensive Care Med* 2013;39:1535-46.

24. Zhang P, Yang Y, Lv R, et al. Effect of the intensity of continuous renal replacement therapy in patients with sepsis and acute kidney injury: a single-center

1  
2  
3 randomized clinical trial. *Nephrol Dial Transplant* 2012;27:967-73.

4  
5  
6 25. Higgins JPT. Cochrane Collaboration Handbook for Systematic Reviews  
7  
8 of Interventions Version 5.1.0. The Cochrane Collaboration, 2011.

9  
10 Available:www.cochrane-handbook.org.

11  
12  
13 26. Boussekey N, Chiche A, Faure K, et al. A pilot randomized study  
14  
15 comparing high and low volume hemofiltration on vasopressor use in septic shock.  
16  
17 *Intensive Care Med* 2008;34:1646-53.

18  
19  
20 27. Vesconi S, Cruz DN, Fumagalli R, et al. Delivered dose of renal  
21  
22 replacement therapy and mortality in critically ill patients with acute kidney injury.  
23  
24 *Crit Care* 2009;13:R57.

25  
26  
27 28. Sterne JA, Sutton AJ, Ioannidis JP, et al. Recommendations for examining  
28  
29 and interpreting funnel plot asymmetry in meta-analyses of randomised controlled  
30  
31 trials. *BMJ* 2011;343:d4002.

32  
33  
34 29. Zhang L, Yang J, Eastwood GM, et al. Extended daily dialysis versus  
35  
36 continuous renal replacement therapy for acute kidney injury: A meta-analysis. *Am J*  
37  
38 *Kidney Dis* 2015; 66(2):322-30.

39  
40  
41 30. Friedrich JO, Wald R, Bagshaw SM, et al. Hemofiltration compared to  
42  
43 hemodialysis for acute kidney injury: systematic review and meta-analysis. *Crit Care*  
44  
45 2012; 16(4):R146. doi: 10.1186/cc11458.  
46  
47  
48  
49  
50  
51  
52  
53  
54  
55  
56  
57  
58  
59  
60



**FIGURE LEGENDS**

**Figure 1.** PRISMA flow diagram of study selection.

**Figure 2.** Meta-analysis for treatment effect of hemofiltration on (A) mortality within 90 days, (B) ICU mortality, (C) in hospital mortality, (D) length of ICU stay, and (E) length of hospital stay.

**Figure 3.** Sensitivity analysis using leave-one-out approach for the treatment effect of hemofiltration (A) mortality within 90 days, (B) ICU mortality, and (C) in hospital mortality.

**Figure S1.** Quality assessment.

Table 1. Summary of basic characteristics of studies included in the for meta-analysis

| Study                | Study design | Number of patients | Treatment             | Prescribed dose (mL/kg/h) | Delivered dose (mL/kg/h) | Duration (days)      | Age (yrs)     | Male (%) | Major cause of AKI | Sepsis      | Oliguria    | Mean APA CHE II score |
|----------------------|--------------|--------------------|-----------------------|---------------------------|--------------------------|----------------------|---------------|----------|--------------------|-------------|-------------|-----------------------|
| Joannes-Boyau (2013) | RCT          | 66                 | High-volume HF        | 70                        | 65.6 (40–67.9)*          | 96 hrs               | 68 (58–77)*   | 68.0 %   | Sepsis             | 66 (100%)   |             |                       |
|                      |              | 71                 | Standard-volume HF    | 35                        | 33.2 (28.7–33.6)*        |                      | 70 (58–75)*   | 54.0 %   |                    | 71 (100%)   |             |                       |
| Vesconi (2009)       | Prospective  | 75                 | More-intensive        | 35                        | 44.8 (9.4)               | 2 (1–3)*             | 61.01 (17.4)  | 58.1 %   | Surgery            | 33 (40.5%)  | 36 (48.6%)  |                       |
|                      |              | 202                | Less-intensive        | 21-34                     | 26.9 (4.0)               | 4 (2–8)*             | 63.48 (15.9)  | 67.8 %   |                    | 81 (40.1%)  | 84 (41.7%)  |                       |
|                      |              | 61                 | Less-intensive        | 20                        | 15.4 (4.2)               | 3 (2–6)*             | 59.05 (19.0)  | 73.8 %   |                    | 19 (31.2%)  | 30 (49.5%)  |                       |
| Zhang (2012)         | RCT          | 141                | EHVHF                 | 85                        | 87.54 (12.54)            | 9.38 (12.06)         | 56.62 (16.38) | 58.9 %   | Septic shock       | 72 (51.06%) |             | 21.97                 |
|                      |              | 139                | HVHF                  | 50                        | 49.99 (9.65)             | 8.88 (10.79)         | 59.96 (18.81) | 64.0 %   |                    | 69 (49.64%) |             | 22.6                  |
| Bouman (2002)        | RCT          | 35                 | EHV                   | 72                        | 48.2 (42.3–58.7)*        | 68.5 (28.0–140.8)*,† | 68 (13)       | 60.0 %   | Cardiac surgery    |             | 35 (100%)   | 23.5                  |
|                      |              | 35                 | ELV                   | 24-36                     | 20.1 (17.5–22.0)*        | 94.0 (53.0–181.5)*,† | 70 (10)       | 57.0 %   |                    | 35 (100%)   | 21.7        |                       |
|                      |              | 36                 | LLV                   | 24-36                     | 19.0 (16.6–21.2)*        | 69.5 (28.3–157.7)*,† | 67 (13)       | 61.0 %   |                    | 30 (100%)   | 23.6        |                       |
| Tolwani (2008)       | RCT          | 100                | High Dosage           | 35                        | 29                       | 10.0 (9.8)           | 58 (16)       | 59.0 %   | Septic shock       | 54 (54%)    | 64 (64%)    | 26                    |
|                      |              | 100                | Standard Dosage       | 20                        | 17                       | 9.7 (11.3)           | 62 (15)       | 57.0 %   |                    | 54 (54%)    | 63 (63%)    | 26                    |
| Bellomo (2009)       | RCT          | 722                | Higher-Intensity CRRT | 40                        | 33.4 (12.8)              | 6.3 (8.7)            | 64.7 (14.5)   | 65.7 %   | Sepsis             | 360 (49.9)  | 430 (59.6%) | 102.5 ‡               |
|                      |              | 743                | Lower-Intensity CRRT  | 25                        | 22 (17.8)                | 5.9 (7.7)            | 64.4 (15.3)   | 63.5 %   |                    | 363 (48.9)  | 444 (59.8%) | 102.3 ‡               |
| Boussekey (2008)     | RCT          | 9                  | HVHF                  | 65                        | 62                       | 7 (2–17)*            | 68 (58–74)*   | 78.0 %   | Sepsis             | 9 (100%)    |             | 31                    |
|                      |              | 10                 | LVHF                  | 35                        | 32                       | 6 (2–14)*            | 72.5 (54–77)* | 80.0 %   |                    | 10 (100%)   |             | 33.5                  |
| Ronco (2000)         | RCT          | 146                |                       | 20                        |                          |                      | 61 (10)       | 55.5 %   | Surgery            | 20 (14%)    |             | 22                    |
|                      |              | 139                |                       | 35                        |                          |                      | 59 (9)        | 55.4 %   |                    | 17 (12%)    |             | 24                    |
|                      |              | 140                |                       | 45                        |                          |                      | 63 (12)       | 57.1 %   |                    | 15 (11%)    |             | 22                    |

1 AKI, acute kidney injury; CRRT, continuous renal-replacement therapy; EHV, early high-volume  
2 hemofiltration; EHVHF, extra high-volume hemofiltration; ELV, early low-volume hemofiltration; HVHF,  
3 high-volume hemofiltration; LLV, late low-volume hemofiltration LVHF, low-volume hemofiltration; RCT,  
4 randomized controlled trial.

5 \*Data were presented by median and inter-quartile range (IQR), and by mean and standard deviation (SD) if not  
6 specified.

7 †Numbers were shown in hours.

8 ‡Measured by APACHE III.  
9  
10  
11  
12  
13  
14  
15  
16  
17  
18  
19  
20  
21  
22  
23  
24  
25  
26  
27  
28  
29  
30  
31  
32  
33  
34  
35  
36  
37  
38  
39  
40  
41  
42  
43  
44  
45  
46  
47  
48  
49  
50  
51  
52  
53  
54  
55  
56  
57  
58  
59  
60

For peer review only

**Table 2. Sensitivity-analysis for treatment effect on mortality according to different cut-off points of prescribed dose and delivered dose**

|                        | Number of studies included | Pooled odds ratio | Lower limit | Upper limit | Z-Value | P-Value |
|------------------------|----------------------------|-------------------|-------------|-------------|---------|---------|
| <b>Prescribed dose</b> |                            |                   |             |             |         |         |
| (A) 90-day mortality   |                            |                   |             |             |         |         |
| 50 mL/kg/h             | 2                          | 0.969             | 0.655       | 1.434       | -0.156  | 0.876   |
| 40 mL/kg/h             | 3                          | 0.831             | 0.500       | 1.382       | -0.712  | 0.476   |
| 30 mL/kg/h             | 2                          | 0.729             | 0.385       | 1.381       | -0.970  | 0.332   |
| (B) ICU mortality      |                            |                   |             |             |         |         |
| 50 mL/kg/h             | 1                          | 1.199             | 0.584       | 2.465       | 0.495   | 0.621   |
| 40 mL/kg/h             | 2                          | 1.039             | 0.845       | 1.278       | 0.365   | 0.715   |
| 30 mL/kg/h             | 3                          | 1.129             | 0.922       | 1.382       | 1.175   | 0.240   |
| (C) Hospital mortality |                            |                   |             |             |         |         |
| 50 mL/kg/h             | 2                          | 1.112             | 0.751       | 1.647       | 0.532   | 0.595   |
| 40 mL/kg/h             | 2                          | 1.015             | 0.709       | 1.453       | 0.080   | 0.936   |
| 30 mL/kg/h             | 2                          | 0.978             | 0.728       | 1.314       | -0.145  | 0.884   |
| <b>Delivered dose</b>  |                            |                   |             |             |         |         |
| (A) 90-day mortality   |                            |                   |             |             |         |         |
| 50 mL/kg/h             | 2                          | 0.969             | 0.655       | 1.434       | -0.156  | 0.876   |
| 40 mL/kg/h             | 1                          | 1.240             | 0.633       | 2.431       | 0.628   | 0.530   |
| 30 mL/kg/h*            | 1                          | 0.997             | 0.811       | 1.225       | -0.033  | 0.974   |
| (B) ICU mortality      |                            |                   |             |             |         |         |
| 50 mL/kg/h             | 1                          | 1.199             | 0.584       | 2.465       | 0.495   | 0.621   |
| 40 mL/kg/h             | 2                          | 1.385             | 0.961       | 1.996       | 1.746   | 0.081   |
| 30 mL/kg/h             | 2                          | 1.163             | 0.837       | 1.616       | 0.900   | 0.368   |

## (C) Hospital mortality

|            |   |       |       |       |        |       |
|------------|---|-------|-------|-------|--------|-------|
| 50 mL/kg/h | 1 | 0.993 | 0.613 | 1.608 | -0.029 | 0.977 |
| 40 mL/kg/h | 1 | 1.391 | 0.707 | 2.735 | 0.957  | 0.339 |
| 30 mL/kg/h | 1 | 0.913 | 0.647 | 1.288 | -0.521 | 0.602 |

\*Ronco et al. (2000) did not provide information on delivered dose of continuous renal replacement therapy, and therefore was excluded.

**Table 3. Meta-regression analysis for each outcome**

| <b>Outcome</b>           | <b>Intercept<sup>a</sup></b> | <b>Slope<sup>a</sup></b> |
|--------------------------|------------------------------|--------------------------|
| Mortality within 90 days | -0.416 (0.191)               | 0.007 (0.004)            |
| ICU mortality            | 0.306 (0.346)                | -0.004 (0.007)           |
| Hospital mortality       | 0.305 (0.344)                | -0.006 (0.007)           |
| Length of ICU stay       | -2.889 (1.901)               | 0.030 (0.038)            |
| Length of hospital stay  | -1.739 (4.133)               | 0.035 (0.081)            |

<sup>a</sup>Presented as point estimate of coefficient and standard error.

1  
2  
3  
4  
5  
6  
7  
8  
9  
10  
11  
12  
13  
14  
15  
16  
17  
18  
19  
20  
21  
22  
23  
24  
25  
26  
27  
28  
29  
30  
31  
32  
33  
34  
35  
36  
37  
38  
39  
40  
41  
42  
43  
44  
45  
46  
47  
48  
49  
50  
51  
52  
53  
54  
55  
56  
57  
58  
59  
60

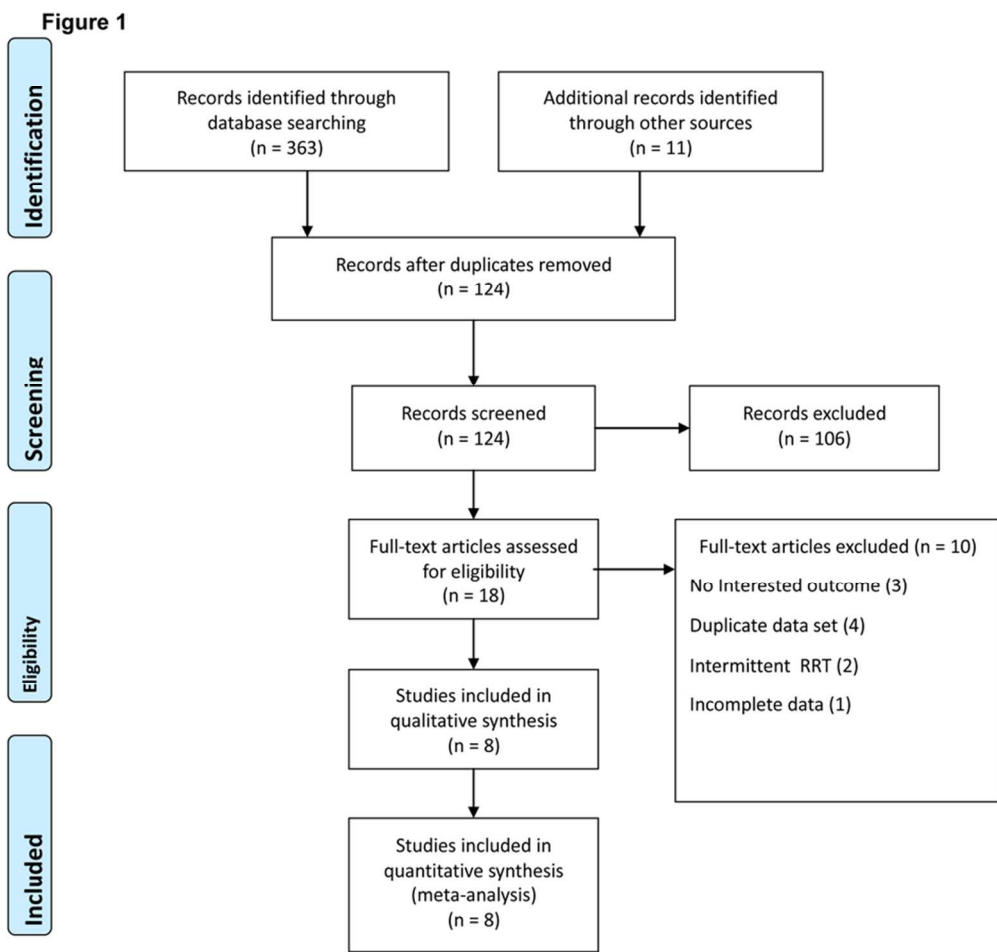

Figure 1

80x79mm (300 x 300 DPI)

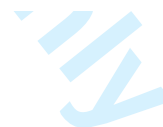

(A) 90-day mortality

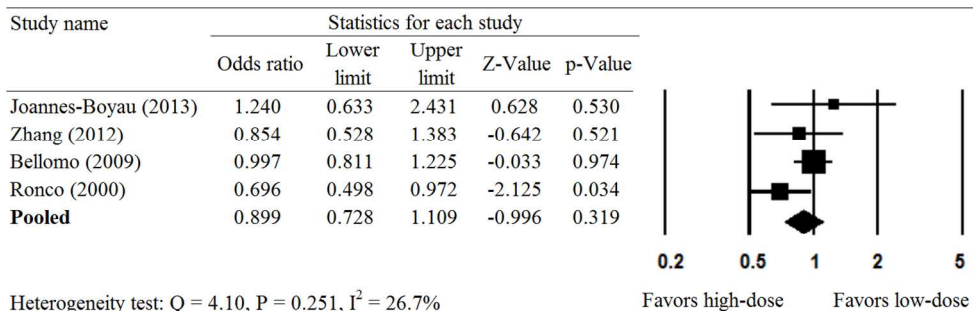

Figure 2A

380x144mm (96 x 96 DPI)

Peer review only

1  
2  
3  
4  
5  
6  
7  
8  
9  
10  
11  
12  
13  
14  
15  
16  
17  
18  
19  
20  
21  
22  
23  
24  
25  
26  
27  
28  
29  
30  
31  
32  
33  
34  
35  
36  
37  
38  
39  
40  
41  
42  
43  
44  
45  
46  
47  
48  
49  
50  
51  
52  
53  
54  
55  
56  
57  
58  
59  
60



(B) ICU mortality

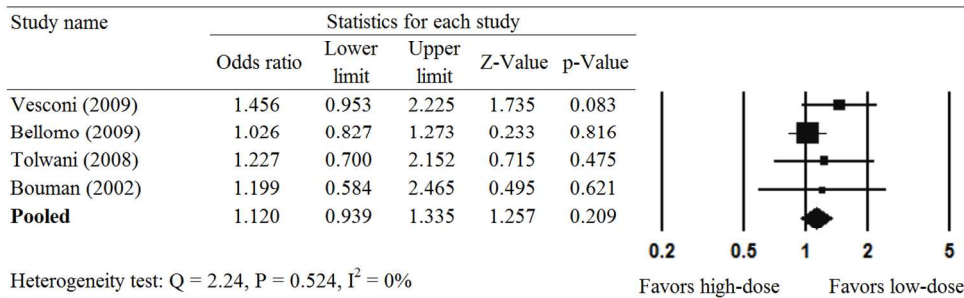

Figure 2B

382x142mm (96 x 96 DPI)

Peer review only

(C) Hospital mortality

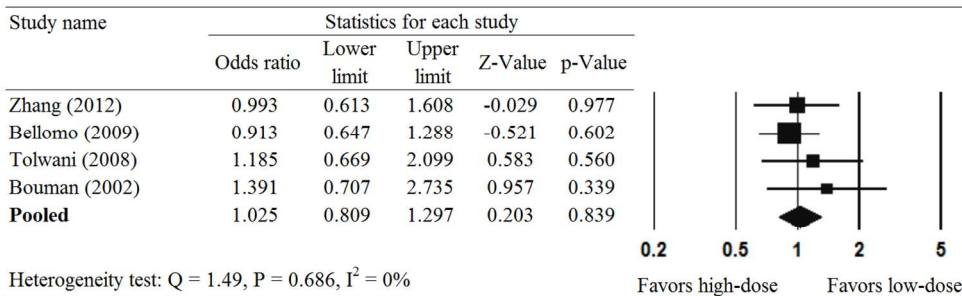

Figure 2C

382x143mm (96 x 96 DPI)

Peer review only

## (D) Length of ICU stay

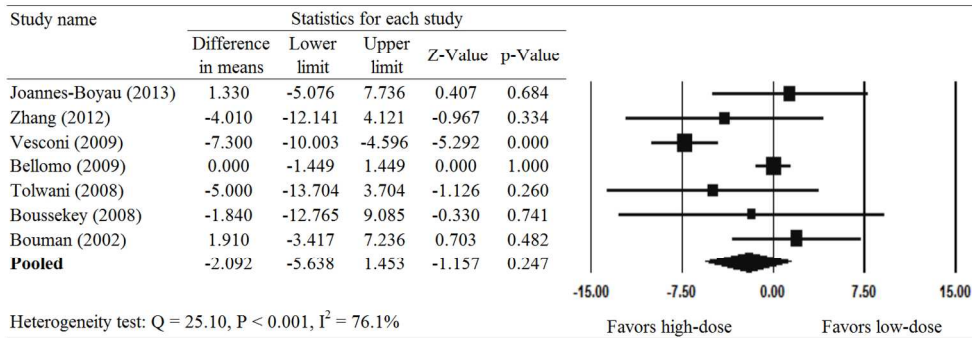

Figure 2D

430x177mm (96 x 96 DPI)

(E) Length of hospital stay

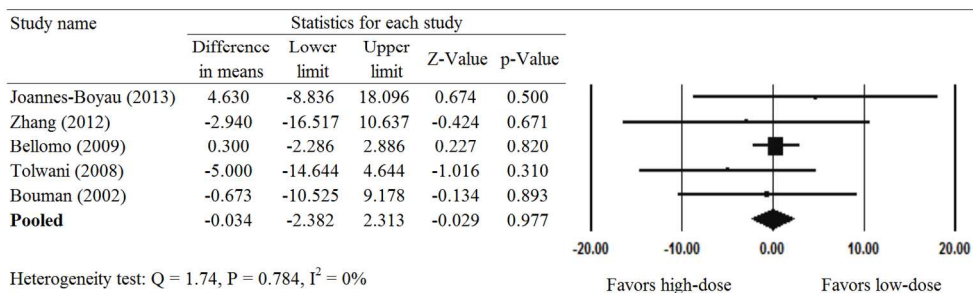

Figure 2E

430x158mm (96 x 96 DPI)

Peer review only

## (A) 90-day mortality

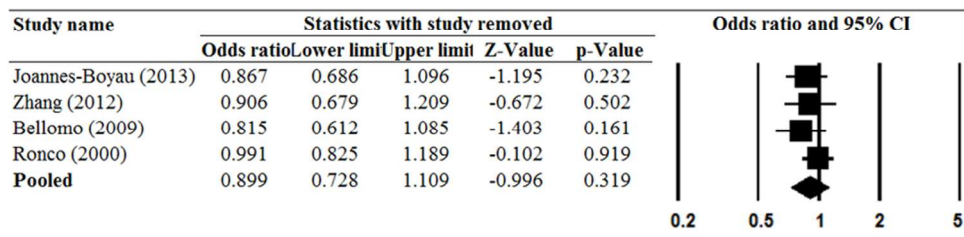

## (B) ICU mortality

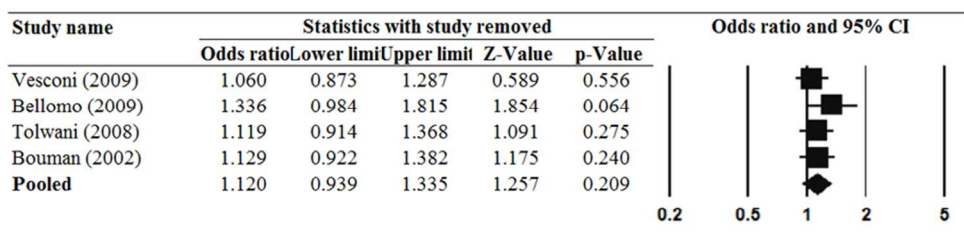

## (C) Hospital mortality

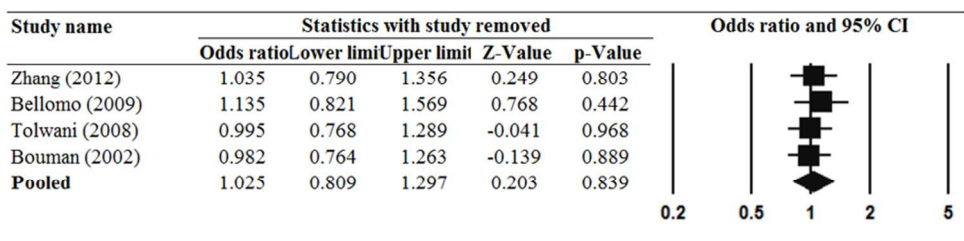

Figure 3

80x80mm (300 x 300 DPI)

Figure S1

(A)

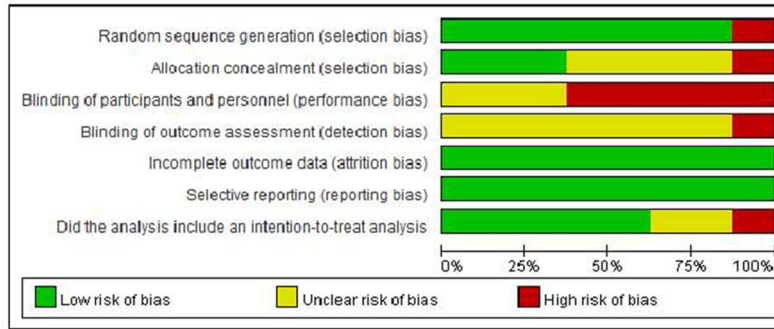

(B)

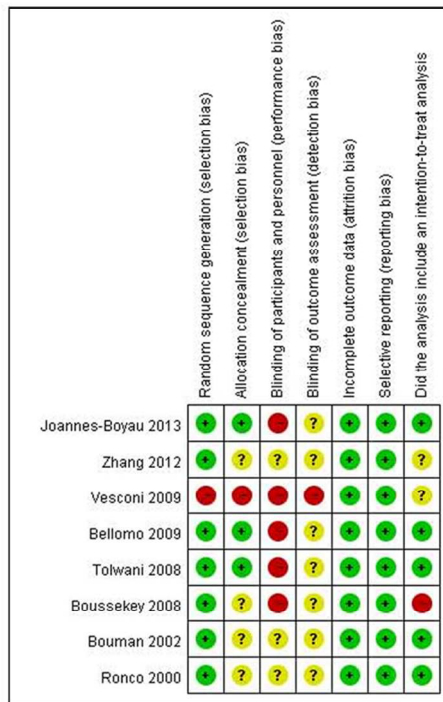

Figure S1

80x113mm (300 x 300 DPI)

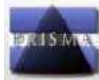

# PRISMA 2009 Checklist

| Section/Topic                      | #  | Checklist Item                                                                                                                                                                                                                                                                                              | Reported on Page # |
|------------------------------------|----|-------------------------------------------------------------------------------------------------------------------------------------------------------------------------------------------------------------------------------------------------------------------------------------------------------------|--------------------|
| <b>TITLE</b>                       |    |                                                                                                                                                                                                                                                                                                             |                    |
| Title                              | 1  | Identify the report as a systematic review, meta-analysis, or both.                                                                                                                                                                                                                                         | 1                  |
| <b>ABSTRACT</b>                    |    |                                                                                                                                                                                                                                                                                                             |                    |
| Structured summary                 | 2  | Provide a structured summary including, as applicable: background; objectives; data sources; study eligibility criteria, participants, and interventions; study appraisal and synthesis methods; results; limitations; conclusions and implications of key findings; systematic review registration number. | 3                  |
| <b>INTRODUCTION</b>                |    |                                                                                                                                                                                                                                                                                                             |                    |
| Rationale                          | 3  | Describe the rationale for the review in the context of what is already known.                                                                                                                                                                                                                              | 5-6                |
| Objectives                         | 4  | Provide an explicit statement of questions being addressed with reference to participants, interventions, comparisons, outcomes, and study design (PICOS).                                                                                                                                                  | 6                  |
| <b>METHODS</b>                     |    |                                                                                                                                                                                                                                                                                                             |                    |
| Protocol and registration          | 5  | Indicate if a review protocol exists, if and where it can be accessed (e.g., Web address), and, if available, provide registration information including registration number.                                                                                                                               |                    |
| Eligibility criteria               | 6  | Specify study characteristics (e.g., PICOS, length of follow-up) and report characteristics (e.g., years considered, language, publication status) used as criteria for eligibility, giving rationale.                                                                                                      | 6-7                |
| Information sources                | 7  | Describe all information sources (e.g., databases with dates of coverage, contact with study authors to identify additional studies) in the search and date last searched.                                                                                                                                  | 6-7                |
| Search                             | 8  | Present full electronic search strategy for at least one database, including any limits used, such that it could be repeated.                                                                                                                                                                               |                    |
| Study selection                    | 9  | State the process for selecting studies (i.e., screening, eligibility, included in systematic review, and, if applicable, included in the meta-analysis).                                                                                                                                                   | 7                  |
| Data collection process            | 10 | Describe method of data extraction from reports (e.g., piloted forms, independently, in duplicate) and any processes for obtaining and confirming data from investigators.                                                                                                                                  | 7                  |
| Data items                         | 11 | List and define all variables for which data were sought (e.g., PICOS, funding sources) and any assumptions and simplifications made.                                                                                                                                                                       | 7                  |
| Risk of bias in individual studies | 12 | Describe methods used for assessing risk of bias of individual studies (including specification of whether this was done at the study or outcome level), and how this information is to be used in any data synthesis.                                                                                      | 7                  |
| Summary measures                   | 13 | State the principal summary measures (e.g., risk ratio, difference in means).                                                                                                                                                                                                                               | 8                  |
| Synthesis of results               | 14 | Describe the methods of handling data and combining results of studies, if done, including measures of consistency (e.g., $I^2$ for each meta-analysis).                                                                                                                                                    | 8                  |

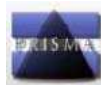

# PRISMA 2009 Checklist

Page 1 of 2

| Section/Topic                 | #  | Checklist Item                                                                                                                                                                                           | Reported on Page # |
|-------------------------------|----|----------------------------------------------------------------------------------------------------------------------------------------------------------------------------------------------------------|--------------------|
| Risk of bias across studies   | 15 | Specify any assessment of risk of bias that may affect the cumulative evidence (e.g., publication bias, selective reporting within studies).                                                             |                    |
| Additional analyses           | 16 | Describe methods of additional analyses (e.g., sensitivity or subgroup analyses, meta-regression), if done, indicating which were pre-specified.                                                         | 8-9                |
| <b>RESULTS</b>                |    |                                                                                                                                                                                                          |                    |
| Study selection               | 17 | Give numbers of studies screened, assessed for eligibility, and included in the review, with reasons for exclusions at each stage, ideally with a flow diagram.                                          | 9                  |
| Study characteristics         | 18 | For each study, present characteristics for which data were extracted (e.g., study size, PICOS, follow-up period) and provide the citations.                                                             | 9                  |
| Risk of bias within studies   | 19 | Present data on risk of bias of each study and, if available, any outcome level assessment (see item 12).                                                                                                | 12                 |
| Results of individual studies | 20 | For all outcomes considered (benefits or harms), present, for each study: (a) simple summary data for each intervention group (b) effect estimates and confidence intervals, ideally with a forest plot. |                    |
| Synthesis of results          | 21 | Present the main results of the review. If meta-analyses done, include for each, confidence intervals and measures of consistency.                                                                       | 10-11              |
| Risk of bias across studies   | 22 | Present results of any assessment of risk of bias across studies (see Item 15).                                                                                                                          |                    |
| Additional analysis           | 23 | Give results of additional analyses, if done (e.g., sensitivity or subgroup analyses, meta-regression [see Item 16]).                                                                                    | 11                 |
| <b>DISCUSSION</b>             |    |                                                                                                                                                                                                          |                    |
| Summary of evidence           | 24 | Summarize the main findings including the strength of evidence for each main outcome; consider their relevance to key groups (e.g., healthcare providers, users, and policy makers).                     | 12-15              |
| Limitations                   | 25 | Discuss limitations at study and outcome level (e.g., risk of bias), and at review-level (e.g., incomplete retrieval of identified research, reporting bias).                                            | 15-16              |
| Conclusions                   | 26 | Provide a general interpretation of the results in the context of other evidence, and implications for future research.                                                                                  | 16                 |
| <b>FUNDING</b>                |    |                                                                                                                                                                                                          |                    |
| Funding                       | 27 | Describe sources of funding for the systematic review and other support (e.g., supply of data); role of funders for the systematic review.                                                               | 16                 |

From: Moher D, Liberati A, Tetzlaff J, Altman DG, The PRISMA Group (2009). Preferred Reporting Items for Systematic Reviews and Meta-Analyses: The PRISMA Statement. PLoS Med 6(6): e1000097. doi:10.1371/journal.pmed1000097

For more information, visit: [www.prisma-statement.org](http://www.prisma-statement.org).

For peer review only - <http://bmjopen.bmj.com/site/about/guidelines.xhtml>



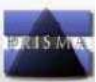

# PRISMA 2009 Checklist

- 1
- 2
- 3
- 4
- 5
- 6
- 7
- 8
- 9
- 10
- 11
- 12
- 13
- 14
- 15
- 16
- 17
- 18
- 19
- 20
- 21
- 22
- 23
- 24
- 25
- 26
- 27
- 28
- 29
- 30
- 31
- 32
- 33
- 34
- 35
- 36
- 37
- 38
- 39
- 40
- 41
- 42
- 43
- 44
- 45
- 46
- 47
- 48
- 49

For peer review only

# BMJ Open

## High- vs. low-dose hemofiltration for the treatment of critically ill patients with acute kidney injury: an updated systematic review and meta-analysis

|                                 |                                                                                                                                                                                                                                                                                                                                                                                                                                                                                                                                                                                                                                                                                                                                                                                |
|---------------------------------|--------------------------------------------------------------------------------------------------------------------------------------------------------------------------------------------------------------------------------------------------------------------------------------------------------------------------------------------------------------------------------------------------------------------------------------------------------------------------------------------------------------------------------------------------------------------------------------------------------------------------------------------------------------------------------------------------------------------------------------------------------------------------------|
| Journal:                        | <i>BMJ Open</i>                                                                                                                                                                                                                                                                                                                                                                                                                                                                                                                                                                                                                                                                                                                                                                |
| Manuscript ID                   | bmjopen-2016-014171.R2                                                                                                                                                                                                                                                                                                                                                                                                                                                                                                                                                                                                                                                                                                                                                         |
| Article Type:                   | Research                                                                                                                                                                                                                                                                                                                                                                                                                                                                                                                                                                                                                                                                                                                                                                       |
| Date Submitted by the Author:   | 14-Apr-2017                                                                                                                                                                                                                                                                                                                                                                                                                                                                                                                                                                                                                                                                                                                                                                    |
| Complete List of Authors:       | Li , Peng ; YantaiYuhuangding Hospital<br>Qu, Li-ping ; YantaiYuhuangding Hospital, Department of Obstetrics<br>Qi, Dong ; YantaiYuhuangding Hospital, Department of Nephrology<br>Shen, Bo ; Zhongshan Hospital, Shanghai Medical College, Fudan University, Department of Nephrology<br>Wang, Yi-mei ; Zhongshan Hospital, Shanghai Medical College, Fudan University<br>Xu, Jia-rui ; Zhongshan Hospital, Shanghai Medical College, Fudan University<br>Jiang, Wu-hua ; Zhongshan Hospital, Shanghai Medical College, Fudan University, Department of Nephrology<br>Zhang, Hao ; Zhongshan Hospital, Shanghai Medical College, Fudan University<br>Ding, Xiao-qiang ; Zhongshan Hospital, Shanghai Medical College, Fudan University, Department of Nephrology<br>Teng, Jie |
| <b>Primary Subject Heading</b>: | Intensive care                                                                                                                                                                                                                                                                                                                                                                                                                                                                                                                                                                                                                                                                                                                                                                 |
| Secondary Subject Heading:      | Intensive care, Urology                                                                                                                                                                                                                                                                                                                                                                                                                                                                                                                                                                                                                                                                                                                                                        |
| Keywords:                       | acute kidney injury, dose, intensive care unit                                                                                                                                                                                                                                                                                                                                                                                                                                                                                                                                                                                                                                                                                                                                 |

SCHOLARONE™  
Manuscripts

1  
2  
3 **High- vs. low-dose hemofiltration for the treatment of critically ill patients with**  
4 **acute kidney injury: an updated systematic review and meta-analysis**  
5  
6

7  
8 **Running title:** Hemofiltration in acute kidney injury  
9

10  
11  
12  
13 Peng Li<sup>1\*</sup>M.D., Li-ping Qu<sup>2\*</sup>M.D., Dong Qi<sup>1</sup>M.D., Bo Shen<sup>3,4</sup>M.D., Yi-mei

14 Wang<sup>3,4</sup>M.D., Jia-rui Xu<sup>3,4</sup>M.D., Wu-hua Jiang<sup>3,4</sup>M.D., Hao Zhang<sup>3,4</sup>M.D., Xiao-qiang

15  
16  
17 Ding<sup>3,4,5</sup>M.D., Jie Teng<sup>3,4,5#</sup>M.D.  
18  
19  
20  
21  
22  
23

24 <sup>1</sup> Department of Nephrology, Yantai Yuhuangding Hospital, Qingdao University, No. 20  
25  
26 Yuhuangding East Road, Yantai, Shandong 264000, China  
27  
28

29 <sup>2</sup> Department of Obstetrics, Yantai Yuhuangding Hospital, Qingdao University, No. 20  
30  
31 Yuhuangding East Road, Yantai, Shandong 26400, China  
32  
33

34 <sup>3</sup> Department of Nephrology, Zhongshan Hospital, Shanghai Medical College, Fudan  
35  
36 University. No 180 Fenglin Road, Shanghai 200032, China  
37  
38

39 <sup>4</sup> Kidney and Dialysis Institute of Shanghai, No 180 Fenglin Road, Shanghai 200032,  
40  
41 China  
42  
43  
44

45 <sup>5</sup> Kidney and Blood Purification Laboratory of Shanghai, No 180 Fenglin Road, Shanghai  
46  
47 200032, China  
48  
49  
50

51  
52  
53  
54 \* Peng Li and Li-ping Qu contributed equally to this manuscript.  
55  
56  
57  
58  
59  
60

1  
2  
3 **#Corresponding author:** Jie Teng  
4

5 Department of Nephrology, Zhongshan Hospital, Shanghai Medical College, Fudan  
6

7 University, No 180 Fenglin Road, Shanghai 200032, China  
8

9  
10 Tel: +8621-64041990-2970; Fax: +8621-64038472  
11

12 Email: [teng.jie@zs-hospital.sh.cn](mailto:teng.jie@zs-hospital.sh.cn)  
13

14 **Word count: 2719**  
15  
16  
17  
18  
19  
20  
21  
22  
23  
24  
25  
26  
27  
28  
29  
30  
31  
32  
33  
34  
35  
36  
37  
38  
39  
40  
41  
42  
43  
44  
45  
46  
47  
48  
49  
50  
51  
52  
53  
54  
55  
56  
57  
58  
59  
60

**ABSTRACT**

**Objective:** The purpose of this study was to perform a systematic review and meta-analysis to evaluate the effect of high-vs. low-dose hemofiltration on the survival of critically ill patients with acute kidney injury (AKI). We hypothesized that high-dose treatments are not associated with a higher risk of mortality.

**Design:** Meta-analysis.

**Setting:** Randomized controlled trials, and two-arm prospective and retrospective studies were included.

**Participants:** Critically ill patients with AKI.

**Interventions:** Continuous renal-replacement therapy.

**Primary and secondary outcome measures:** Primary outcomes: 90-day mortality, intensive care unit (ICU) mortality, hospital mortality; secondary outcomes: length of ICU and hospital stay.

**Result:** Eight studies including 2,970 patients were included in the analysis. Pooled results showed no significant difference in the 90-mortality rate between patients treated with high- or low-dose hemofiltration (pooled odds ratio [OR] = 0.90, 95% confidence interval [CI]: 0.73 to 1.11, P = 0.32). Findings were similar for ICU (pooled OR = 1.12, 95% CI: 0.94 to 1.34, P = 0.21) and hospital mortality (pooled OR = 1.03, 95% CI: 0.81 to 1.30, P = 0.84). Length of ICU and hospital stay were similar between high- and low-dose groups. Pooled results are not overly influenced by any one study, different cut-off points of prescribed dose, or different cut-off points of delivered dose. Meta-regression analysis indicated that the results were not affected by the percentage of patients with sepsis or septic shock.

1  
2  
3 **Conclusion:** High- and low-dose hemofiltration produce similar outcomes with respect to  
4 mortality and length of ICU and hospital stay in critically ill patients with AKI.  
5  
6  
7  
8  
9

10 This study was not registered at the time the data were collected and analyzed. It has  
11 since been registered on February 17, 2017 at <http://www.researchregistry.com/>,  
12 registration number: reviewregistry211.  
13  
14

15 **Keywords:** acute kidney injury, dose, intensive care unit, intensity, renal dialysis, renal-  
16 replacement therapy  
17  
18  
19  
20  
21

### 22 **Strengths and limitations of this study**

- 23 • The strengths of this study are the inclusion of the most current literature,  
24 and the meta-regression analysis which evaluated the impact of patients with  
25 sepsis or septic shock on the overall pooled analysis.  
26
- 27 • The limitation of this analysis is the considerable variation across the  
28 studies with regard to the prescribed doses for the high- and low-dose  
29 hemofiltration.  
30  
31  
32  
33  
34  
35  
36  
37  
38  
39  
40  
41  
42  
43  
44  
45  
46  
47  
48  
49  
50  
51  
52  
53  
54  
55  
56  
57  
58  
59  
60

## INTRODUCTION

Acute kidney injury (AKI) occurs in at least 5% of patients with who are admitted to the intensive care unit (ICU), and is an independent predictor of mortality.[1-3] In addition, about 50% of patients with septic shock will experience AKI.[4] The prognosis of patients with AKI is low, with a mortality rate of up to 70% despite improvements in hemodialysis and availability.[5-7]

Two methods for obtaining clearance in patients with AKI who require renal support are hemofiltration and hemodialysis. Hemofiltration uses convection to aid in the removal of middle molecular weight solutes, which is determined by the pore size of the membrane.[8] Hemofiltration is believed to be superior to hemodialysis in patients with AKI as it is thought it can remove the toxic mediators of sepsis and inflammation.[8]

For patients who require RRT, the treatment dose or intensity may influence outcomes. Continuous renal replacement therapy (CRRT) in the form of hemofiltration is an option for treating patients with AKI, and may provide better clearance of toxic molecules, acid-base homeostasis, and removal of inflammatory mediators that can contribute to organ injury and dysfunction than other methods.[9-13] However, the optimum dosage of hemofiltration, including the ideal timing and dose is not clear. Some studies have reported benefits with intensive doses of CRRT with respect to mortality,[14,15] while others have not.[16-19]

Several prior systematic reviews and meta-analyses have assessed the use of CRRT for treating AKI. These studies found that high-dose CRRT was not associated with a decrease in mortality in patients with AKI.[20-22] Since the publication of these reviews, additional clinical studies have been published that addressed the use of CRRT in

1  
2  
3 AKI.[23,24] Prior reviews have addressed both hemofiltration and hemodialysis, which  
4  
5 may not provide sufficient data with respect to either method.  
6  
7

8 Thus, the purpose of this study was to perform a systematic review and meta-analysis  
9  
10 to evaluate the effect of high-vs. low-dose hemofiltration on the survival of critically ill  
11  
12 patients with AKI. We hypothesized that high-dose treatments are not associated with a  
13  
14 higher risk of mortality.  
15  
16

## 17 18 19 20 **MATERIAL AND METHODS**

### 21 22 *Search strategy*

23  
24 This meta-analysis was performed according to the PRISMA guidelines. This study was  
25  
26 not registered at the time the data were collected and analyzed. It has since been  
27  
28 registered on February 17, 2017 at <http://www.researchregistry.com/>, registration number:  
29  
30 reviewregistry211.  
31  
32

33  
34 PubMed, Medline, Cochrane, Google Scholar databases were searched until June 22,  
35  
36 2016 using the following search terms: renal-replacement therapy, renal dialysis, acute  
37  
38 kidney injury, intensive care unit, intensity, dose. Included studies were randomized  
39  
40 controlled trials (RCTs), two-arm prospective, retrospective, or cohort studies that  
41  
42 evaluated critically ill patients with AKI who received hemofiltration. Included studies  
43  
44 had to report quantitative outcomes of interest. Letters, comments, editorials, case  
45  
46 reports, proceeding, and personal communications were excluded. Studies that evaluated  
47  
48 patients who had received previous RRT during the same hospital admission or who were  
49  
50 on maintenance dialysis for end-stage kidney disease were excluded. The database  
51  
52 searches were performed by two independent (two of the authors) reviewers. The authors  
53  
54  
55  
56  
57  
58  
59  
60



1  
2  
3 independently reviewed all potential studies, and extracted data of interest. A third  
4  
5 reviewer was consulted to resolve any questions regarding inclusion of studies or data in  
6  
7 the analysis, and a decision was arrived at by consensus.  
8  
9

### 10 11 12 ***Data extraction and quality assessment***

13  
14 The following information/ data were extracted from studies that met the inclusion  
15  
16 criteria: the name of the first author, year of publication, study design, number of  
17  
18 participants in each group, participants' age and gender, and the major outcomes of death  
19  
20 up to 90-days (90 day mortality), ICU mortality, hospital mortality, and length of hospital  
21  
22 or ICU stay.  
23  
24  
25

26  
27 The quality of the included studies was evaluated using the Cochran Risk of Bias tool  
28  
29 outlined in the Cochrane Collaboration Handbook for Systematic Reviews of  
30  
31 Interventions Version 5.1.0.[25]  
32  
33  
34  
35

### 36 37 ***Statistical analysis***

38  
39 Primary outcomes were 90-day mortality, ICU mortality, and hospital mortality.  
40  
41 Secondary outcomes were length of ICU and hospital stay. Comparisons of the different  
42  
43 mortality rates between patients receiving high- or low-dose hemofiltration were  
44  
45 presented by odds ratio (OR) and 95% confidence interval (95% CI); an OR > 1 indicated  
46  
47 that patients treated with high-intensity hemofiltration had a higher risk of death. The  
48  
49 effect size of length of ICU and hospital stay was reported as difference in means; a  
50  
51 difference in means > 0 indicated longer ICU or hospital stay in patients treated with  
52  
53 high-dose hemofiltration. Pooled estimates for odds ratios and difference in means were  
54  
55  
56  
57  
58  
59  
60

1  
2  
3 calculated using the DerSimonian and Laird random-effects model. A 2-sided P-value <  
4  
5 0.05 was considered statistically significant.  
6  
7

8 Heterogeneity was assessed using the Cochran Q and the  $I^2$  statistic. For the Q  
9  
10 statistic,  $P < 0.10$  was considered statistically significant for heterogeneity. The  $I^2$  statistic  
11  
12 indicates the percentage of the observed between-study variability due to heterogeneity.  
13  
14 The suggested ranges are as follows: no heterogeneity ( $I^2 = 0\%$  to  $25\%$ ), moderate  
15  
16 heterogeneity ( $I^2 = 25\%$  to  $50\%$ ), large heterogeneity ( $I^2 = 50\%$  to  $75\%$ ), and extreme  
17  
18 heterogeneity ( $I^2 = 75\%$  to  $100\%$ ).  
19  
20  
21

22 Sensitivity analysis was performed for the primary outcomes using the leave-one-  
23  
24 out approach. Due to various definitions of high- and low-dose hemofiltration between  
25  
26 the studies, additional sensitivity analysis was performed to examine the stability of  
27  
28 pooled estimates according to various cut-off points of prescribed dose as well as the  
29  
30 actual delivered dose. Meta-regression analysis was performed to examine whether the  
31  
32 percentage of patients with sepsis or septic shock influenced the pooled estimates of the  
33  
34 associations between hemofiltration and outcomes of interest. All analyses were  
35  
36 performed using Comprehensive Meta-Analysis statistical software, version 2.0 (Biostat,  
37  
38 Englewood, NJ).  
39  
40  
41  
42  
43  
44  
45

## 46 RESULTS

47  
48 A total of 374 studies were identified in the initial search, of which 250 were excluded for  
49  
50 being duplicate publications (Figure 1). Of the remaining 124 studies, 106 were excluded  
51  
52 for not being relevant by review of title and/or abstract. The remaining 18 full-text  
53  
54  
55  
56  
57  
58  
59  
60

1  
2  
3 articles were examined, and 10 were excluded, the reasons for which are shown in Figure  
4  
5  
6 1. Thus, eight studies were included in the meta-analysis.[14,16,17,19,23,24,26,27]  
7

8 Of the eight studies, seven were RCTs [14,16,17,23,24,26] and one was a prospective  
9  
10 study [27] (Table 1). A total of 2,970 patients were included, and the number of patients  
11  
12 per study ranged from 19 to 1465. The mean patient age ranged from 59 to 73 years, over  
13  
14 half of the patients were male (54% to 80%), and the causes for of AKI requiring RRT  
15  
16 were sepsis, surgery (including cardiovascular surgery), and septic shock. Six of the eight  
17  
18 studies reported mean APACHE II or III scores for the groups studied, and the mean  
19  
20 scores were similar between the groups in the individual studies. The type of treatment,  
21  
22 and the definition of high-dose or more-intensive therapy varied across the studies. The  
23  
24 doses used also varied, with low-dose ranging from 20 to 36 mL/kg/h and high-dose  
25  
26 ranging from 35 to 85 mL/kg/h.  
27  
28  
29  
30  
31  
32  
33

### 34 *Meta-analysis*

35  
36 Results of meta-analysis of the primary outcomes of within 90-day  
37  
38 morality,[14,17,23,24] ICU mortality,[16,17,19,27], and hospital mortality [16,17,19,24]  
39  
40 are presented in Figure 2. The pooled results showed no significant difference in the 90-  
41  
42 mortality rate between patients treated with high- or low-dose hemofiltration (pooled OR  
43  
44 = 0.90, 95% CI: 0.73 to 1.11, P = 0.32) (Figure 2A). The findings were similar for ICU  
45  
46 mortality (pooled OR = 1.12, 95% CI: 0.94 to 1.34, P = 0.21) and hospital mortality  
47  
48 (pooled OR = 1.02, 95% CI: 0.81 to 1.30, P = 0.84) (Figure 2B, C). There was low to  
49  
50 moderate heterogeneity across the studies for each outcome (Q = 4.10, P = 0.25, I<sup>2</sup> =  
51  
52 26.7%; Q = 2.24, P = 0.52, I<sup>2</sup> = 0%; and Q = 1.49, P = 0.69, I<sup>2</sup> = 0%, respectively).  
53  
54  
55  
56  
57  
58  
59  
60

1  
2  
3  
4  
5  
6  
7  
8  
9  
10  
11  
12  
13  
14  
15  
16  
17  
18  
19  
20  
21  
22  
23  
24  
25  
26  
27  
28  
29  
30  
31  
32  
33  
34  
35  
36  
37  
38  
39  
40  
41  
42  
43  
44  
45  
46  
47  
48  
49  
50  
51  
52  
53  
54  
55  
56  
57  
58  
59  
60

No significant difference was found in the length of ICU stay between patients who received high- vs. low-dose treatment (pooled difference in means = -2.09, 95% CI: -5.64 to 1.45,  $P = 0.25$ ) (Figure 2D). However, large heterogeneity was observed across the seven studies that reported data for length of ICU stay ( $Q = 25.10$ ,  $P < 0.001$ ,  $I^2 = 76.1\%$ ). The results were similar for length of hospital stay (pooled difference in means = -0.03, 95% CI: -2.38 to 2.31,  $P = 0.98$ ); however, no heterogeneity was observed for data regarding length of hospital stay ( $Q = 1.74$ ,  $P = 0.78$ ,  $I^2 = 0\%$ ) (Figure 2E).

### ***Sensitivity analysis, meta-regression analysis, and quality assessment***

Sensitivity analysis was performed in several ways. First, we used the leave-one-out approach to examine whether any single study influenced the pooled results of primary outcomes. The pooled results for the three primary outcomes did not significantly change when each study was removed in turn (Figure 3). Second, the use of various cut-off points of prescribed dose might minimize the influence of the various definitions of high- and low-dose in the included studies. Analysis indicated that the results were stable regardless of cut-off points of prescribed dose. Furthermore, we also performed analyses for the actual delivered dose with the same cut-off points, and the statistical significance was consistent when delivered dose was used in the analysis (Table 2). Taken together, these findings indicate that the pooled results are not overly influenced by any one study, different cut-off points of prescribed dose, or different cut-off points of delivered dose.

Meta-regression analysis was performed to examine whether patients with sepsis or septic shock affected the overall pooled analysis. The reason for the analysis was based on the fact that sepsis and septic shock differ in terms of blood pressure instability and

1  
2  
3 possible emergent death. The results showed that the regression coefficients had a slope  
4  
5 close to 0, indicating that the associations between RRT and selected outcomes were not  
6  
7 influenced by the percentage of patients with sepsis or septic shock (P-values for all slope  
8  
9 coefficients > 0.05) (Table 3).

10  
11  
12 Assessment of the quality of the included studies using the Cochran Risk of Bias tool  
13  
14 indicated that there was low risk of bias for most of the studies (Figure S1A and S1B).  
15  
16 One exception was the study of Vesconi et al., [27] which showed a high risk of selection,  
17  
18 performance, and detection bias (Figure S1B). Overall, the included studies were of  
19  
20 adequate quality.  
21  
22

23  
24  
25 Publication bias assessment was not performed due to limited number of included  
26  
27 studies; 10 or more studies are necessary to assess publication bias.[28]  
28  
29

## 30 31 32 **DISCUSSION**

33  
34 The purpose of this study was to conduct a systematic review and meta-analysis to  
35  
36 examine the effect of hemofiltration dosage on mortality, length of hospital stay, and  
37  
38 length of ICU stay in patients with AKI. For all outcomes examined, there was no  
39  
40 difference between patients who received high- vs. low-dose hemofiltration. The results  
41  
42 were consistent when the analyses used prescribed or delivered dose, and not influenced  
43  
44 by the percentage of patients with sepsis or septic shock. Sensitivity analysis and quality  
45  
46 assessment indicated no one study dominated the results, and that the included data was  
47  
48 of adequate quality.  
49  
50

51  
52  
53 There results of this study are consistent with three prior meta-analyses, all of which  
54  
55 found no survival benefit, or increased mortality, of high-dose CRRT in patients with  
56  
57  
58  
59  
60

1  
2  
3 acute renal failure.[20-22] Although, our findings are similar to prior studies, a strength  
4  
5 of our analysis is the meta-regression analysis with evaluated the impact of patients with  
6  
7 sepsis or septic shock on the overall pooled analysis. The meta-regression analysis  
8  
9 indicated that heterogeneity due to a mixed population of sepsis and septic shock patients  
10  
11 did not influence the pooled results. In addition, we included two additional studies that  
12  
13 were not included in the prior meta-analyses. The consistency of finding across the  
14  
15 different meta-analyses, and findings of our meta-regression analysis, suggest that the  
16  
17 delivered dose is not affected by the presence of systemic infection, and any variance  
18  
19 seen when treating patients may reflect the severity of the acute kidney disease and/or an  
20  
21 individual patient's condition.  
22  
23  
24  
25  
26

27 The data from clinical studies on the benefit of high-dose hemofiltration in critically  
28  
29 ill patients have been inconsistent. In 2000 Ronco et al.[14] reported improved survival  
30  
31 with higher total effluent volumes ( $> 45$  mL/kg/h) in patients with septic AKI , and in  
32  
33 2008, in a small pilot study, Boussekey et al.[26] found that high dose RRT was  
34  
35 associated with an improved hemodynamic profile. However, that study did not find any  
36  
37 significant effect on survival or organ dysfunction. In contrast, two randomized  
38  
39 controlled multicenter studies found no added survival benefit of high-dose compared  
40  
41 with standard-dose CRRT in critically ill patients with AKI.[17,18] A more recent study  
42  
43 by Joannes-Boyau et al.[23] also found no evidence that high-dose (70 mL/kg/h)  
44  
45 compared with standard-dose (35 ml/kg/h) RRT resulted in reduction in 28-day mortality,  
46  
47 or to early improvements in hemodynamic profile or organ dysfunction in septic shock  
48  
49 patients with AKI.[23]  
50  
51  
52  
53  
54  
55  
56  
57  
58  
59  
60

1  
2  
3 A prior meta-analysis compared the efficacy of extended daily dialysis (EDD) and  
4 CCRT in treating patients with acute kidney injury. Zhang et al.[29] included 17 studies  
5 from 2000-2014 with a total of 1,208 patients. Meta-analysis of the included RCTs (n =  
6 10) found no difference in mortality rates between EDD and CRRT (relative risk, 0.90;  
7 95% CI, 0.74-1.11; P = 0.3). However, lower mortality risk was observed with EDD  
8 compared with CRRT in observational studies (relative risk, 0.86; 95% CI, 0.74-1.00;  
9 P=0.05). For both RCTs and observational studies, recovery of kidney function, fluid  
10 removal, and days in the ICU were similar between procedures. The authors concluded  
11 that the findings from RCTs suggest that CRRT and EDD have similar efficacy, and that  
12 the difference in mortality observed in the analysis of the observational studies may be  
13 confounded by selection bias. The potential confounding effect of observational studies is  
14 also indicated by our quality assessment of the included studies which indicated that the  
15 observational study of Vesconi et al.[27] had a high risk of selection bias, as well as  
16 performance and detection bias.  
17  
18  
19  
20  
21  
22  
23  
24  
25  
26  
27  
28  
29  
30  
31  
32  
33  
34  
35

36 The current analysis focused on hemofiltration. However, hemodialysis is also used to  
37 treat patients with AKI. Friedrich et al.[30] performed a meta-analysis in 2012 that  
38 included 19 RCTs that focused on the difference between hemofiltration and  
39 hemodialysis with similar doses. They found weak evidence supporting the increased  
40 clearance of medium to large molecules by hemofiltration compared to hemodialysis, but  
41 there was no difference in mortality between the two methods. No dose comparison was  
42 performed in their study.  
43  
44  
45  
46  
47  
48  
49  
50  
51

52 Our study was limited by the considerable variation across the studies with regard to  
53 the prescribed doses for high- and low-dose hemofiltration. It is difficult to standardize  
54  
55  
56  
57  
58  
59  
60

1  
2  
3 the prescribed and delivered doses across the studies due to differences in equipment used  
4 and personnel. There was also a wide range of effect size, and several of the studies  
5  
6 reported opposite findings. In addition, only four of the included studies reported data for  
7  
8 the primary endpoint of mortality within 90-days, and not all the studies were RCTs. In  
9  
10 addition, due to the heterogeneity of dosing across studies, the differences in the  
11  
12 definition of high-dose, and the fact that the raw data for each group was not presented, it  
13  
14 was difficult to group the analysis according to a cut-off value of the standard of care  
15  
16 dose of 35 mL/kg/hr. For example, Vesconi et al.[27] defined 35mL/kg/h as “more  
17  
18 intensive” and compared the finding of that dosing with “less intensive” < 20 to 34  
19  
20 mL/kg/h. This differed, for example, from the study by Zhang et al.[29] which compared  
21  
22 85 mL/kg/h with 50 mL/kg/hr. It is highly possible that this variability may have  
23  
24 confounded our results. However, sensitivity analysis found that no one study overly  
25  
26 influences the findings; thus suggesting that although heterogeneity in dosing was  
27  
28 present, the pooled results are robust. In addition, six of the eight studies reported mean  
29  
30 APACHE II or III scores for the groups studied, and the mean scores were similar  
31  
32 between the groups in the individual studies, indicating that the illness severity was  
33  
34 similar between the groups in each of these six studies. Subgroup analyses of different  
35  
36 covariates, such as according to renal function, would aid in the analysis; however, due to  
37  
38 limited availability of raw data few variables can be investigated. Lastly, our original  
39  
40 intention was to perform a meta-analysis examining the outcomes of using different doses  
41  
42 of renal replacement therapy and during our initial literature search we included all  
43  
44 modalities of CRRT. However, we found that the majority of studies that compared  
45  
46  
47  
48  
49  
50  
51  
52  
53  
54  
55  
56  
57  
58  
59  
60



1  
2  
3 different dosages used hemofiltration rather than other modalities. For this reason we  
4  
5 limited the analysis to hemofiltration.  
6  
7

8 This results of this meta-analysis found that mortality rates and length of ICU and  
9  
10 hospital stay were not different between critically ill patients with AKI who received  
11  
12 high- or low-dose hemofiltration.  
13  
14

### 15 16 17 **Acknowledgements**

18 We would like to express our sincere gratitude to our colleagues whose names did not  
19  
20 appear as authors, but also contributed to the study. We especially thank Xiao Tan, Jifu  
21  
22 Jin, and Zhouping Zou for collecting the data.  
23  
24  
25

### 26 27 **Funding source**

28  
29 Key Project in the National Science & Technology Pillar Program in the Twelfth Five-  
30  
31 year Plan Period (2011BAI10B07); Scientific Research Project of Shanghai Committee  
32  
33 of Science and Technology (12DJ1400201); the Use of Early Intervention Techniques and  
34  
35 Specification in CKD (2013SY048)  
36  
37

38  
39 **Competing interests:** None

### 40 41 **Author contributions:**

42  
43 PL: study design, literature research, manuscript preparation; LPQ: study design,  
44  
45 literature research, manuscript preparation; DQ: manuscript preparation, data acquisition,  
46  
47 data analysis; BS: manuscript preparation, data acquisition, data analysis; YW:  
48  
49 manuscript preparation, data acquisition, data analysis; JRX: manuscript preparation, data  
50  
51 acquisition, data analysis; WHJ: data analysis, statistical analysis; HZ: data analysis,  
52  
53 statistical analysis; XQD: guarantor of integrity of the entire study, study concepts; JT:  
54  
55  
56  
57  
58  
59  
60

1  
2  
3 study concepts, study design, guarantor of integrity of the entire, study, manuscript  
4  
5 editing  
6  
7

8 **Ethics approval:** Meta-analyses do not require ethical approval as no experiments on  
9  
10 humans or animals are performed.  
11

12 **Informed Consent:** Not applicable  
13

14  
15  
16  
17 **Data sharing statement:** No additional data available  
18  
19  
20  
21  
22  
23  
24  
25  
26  
27  
28  
29  
30  
31  
32  
33  
34  
35  
36  
37  
38  
39  
40  
41  
42  
43  
44  
45  
46  
47  
48  
49  
50  
51  
52  
53  
54  
55  
56  
57  
58  
59  
60

## REFERENCES

1. Metnitz PG, Krenn CG, Steltzer H, et al. Effect of acute renal failure requiring renal replacement therapy on outcome in critically ill patients. *Crit Care Med* 2002;30:2051-8.
2. Uchino S, Kellum JA, Bellomo R, et al. Acute renal failure in critically ill patients: a multinational, multicenter study. *JAMA* 2005;294:813-8.
3. Uchino S, Bellomo R, Goldsmith D, et al. An assessment of the RIFLE criteria for acute renal failure in hospitalized patients. *Crit Care Med* 2006;34:1913-7.
4. Bagshaw SM, Uchino S, Bellomo R, et al. Timing of renal replacement therapy and clinical outcomes in critically ill patients with severe acute kidney injury. *J Crit Care* 2009;24:129-40.
5. Keir I, Kellum JA. Acute kidney injury in severe sepsis: pathophysiology, diagnosis, and treatment recommendations. *J Vet Emerg Crit Care (San Antonio)* 2015;25:200-9.
6. Kellum JA, Angus DC. Patients are dying of acute renal failure. *Crit Care Med* 2002;30:2156-7.
7. Srisawat N, Kellum JA. Acute kidney injury: definition, epidemiology, and outcome. *Curr Opin Crit Care* 2011;17:548-55.
8. Depner TA. "Artificial" hemodialysis versus "natural" hemofiltration. *Am J Kidney Dis* 2008;52:403-406.
9. Bellomo R, Tipping P, Boyce N. Continuous veno-venous hemofiltration with dialysis removes cytokines from the circulation of septic patients. *Crit Care*

1  
2  
3  
4  
5  
6  
7  
8  
9  
10  
11  
12  
13  
14  
15  
16  
17  
18  
19  
20  
21  
22  
23  
24  
25  
26  
27  
28  
29  
30  
31  
32  
33  
34  
35  
36  
37  
38  
39  
40  
41  
42  
43  
44  
45  
46  
47  
48  
49  
50  
51  
52  
53  
54  
55  
56  
57  
58  
59  
60

*Med* 1993;21:522-6.

10. Heering P, Morgera S, Schmitz FJ, et al. Cytokine removal and cardiovascular hemodynamics in septic patients with continuous venovenous hemofiltration. *Intensive Care Med* 1997;23:288-96.

11. Hoffmann JN, Hartl WH, Deppisch R, et al. Effect of hemofiltration on hemodynamics and systemic concentrations of anaphylatoxins and cytokines in human sepsis. *Intensive Care Med* 1996;22:1360-7.

12. Honore PM, Joannes-Boyau O. High volume hemofiltration (HVHF) in sepsis: a comprehensive review of rationale, clinical applicability, potential indications and recommendations for future research. *Int J Artif Organs* 2004;27:1077-82.

13. Rimmele T, Kellum JA. High-volume hemofiltration in the intensive care unit: a blood purification therapy. *Anesthesiology* 2012;116:1377-87.

14. Ronco C, Bellomo R, Homel P, et al. Effects of different doses in continuous veno-venous haemofiltration on outcomes of acute renal failure: a prospective randomised trial. *Lancet* 2000;356:26-30.

15. Saudan P, Niederberger M, De Seigneux S, et al. Adding a dialysis dose to continuous hemofiltration increases survival in patients with acute renal failure. *Kidney Int* 2006;70:1312-7.

16. Bouman CS, Oudemans-Van Straaten HM, Tijssen JG, et al. Effects of early high-volume continuous venovenous hemofiltration on survival and recovery of renal function in intensive care patients with acute renal failure: a prospective, randomized trial. *Crit Care Med* 2002;30:2205-11.

1  
2  
3 17. The RENAL Replacement Therapy Study Investigators: Bellomo R, Cass  
4 A, Cole L, et al. Intensity of continuous renal-replacement therapy in critically ill  
5 patients. *N Engl J Med* 2009;361:1627-38.  
6  
7

8  
9  
10 18. Network VNARFT, Palevsky PM, Zhang JH, et al. Intensity of renal  
11 support in critically ill patients with acute kidney injury. *N Engl J Med* 2008;359:7-  
12  
13  
14  
15 20.

16  
17 19. Tolwani AJ, Campbell RC, Stofan BS, et al. Standard versus high-dose  
18 CVVHDF for ICU-related acute renal failure. *J Am Soc Nephrol* 2008;19:1233-8.  
19

20  
21 20. Casey ET, Gupta BP, Erwin PJ, et al. The dose of continuous renal  
22 replacement therapy for acute renal failure: a systematic review and meta-analysis.  
23  
24  
25  
26  
27 *Ren Fail* 2010;32:555-61.

28  
29 21. Negash DT, Dhingra VK, Copland M, et al. Intensity of continuous renal  
30 replacement therapy in acute kidney injury in the intensive care unit: a systematic  
31  
32  
33  
34  
35  
36 review and meta-analysis. *Vasc Endovascular Surg* 2011;45:504-10.

37  
38 22. Van Wert R, Friedrich JO, Scales DC, et al. High-dose renal replacement  
39 therapy for acute kidney injury: Systematic review and meta-analysis. *Crit Care Med*  
40  
41  
42  
43 2010;38:1360-9.

44  
45 23. Joannes-Boyau O, Honore PM, Perez P, et al. High-volume versus  
46 standard-volume haemofiltration for septic shock patients with acute kidney injury  
47  
48  
49  
50  
51  
52 (IVOIRE study): a multicentre randomized controlled trial. *Intensive Care Med*  
53  
54  
55 2013;39:1535-46.

56  
57 24. Zhang P, Yang Y, Lv R, et al. Effect of the intensity of continuous renal  
58 replacement therapy in patients with sepsis and acute kidney injury: a single-center  
59  
60

1  
2  
3 randomized clinical trial. *Nephrol Dial Transplant* 2012;27:967-73.

4  
5 25. Higgins JPT. Cochrane Collaboration Handbook for Systematic Reviews  
6  
7 of Interventions Version 5.1.0. The Cochrane Collaboration, 2011.

8  
9 Available:www.cochrane-handbook.org.

10  
11 26. Boussekey N, Chiche A, Faure K, et al. A pilot randomized study  
12  
13 comparing high and low volume hemofiltration on vasopressor use in septic shock.  
14  
15 *Intensive Care Med* 2008;34:1646-53.

16  
17 27. Vesconi S, Cruz DN, Fumagalli R, et al. Delivered dose of renal  
18  
19 replacement therapy and mortality in critically ill patients with acute kidney injury.  
20  
21 *Crit Care* 2009;13:R57.

22  
23 28. Sterne JA, Sutton AJ, Ioannidis JP, et al. Recommendations for examining  
24  
25 and interpreting funnel plot asymmetry in meta-analyses of randomised controlled  
26  
27 trials. *BMJ* 2011;343:d4002.

28  
29 29. Zhang L, Yang J, Eastwood GM, et al. Extended daily dialysis versus  
30  
31 continuous renal replacement therapy for acute kidney injury: A meta-analysis. *Am J*  
32  
33 *Kidney Dis* 2015; 66(2):322-30.

34  
35 30. Friedrich JO, Wald R, Bagshaw SM, et al. Hemofiltration compared to  
36  
37 hemodialysis for acute kidney injury: systematic review and meta-analysis. *Crit Care*  
38  
39 2012; 16(4):R146. doi: 10.1186/cc11458.

**FIGURE LEGENDS**

**Figure 1.** PRISMA flow diagram of study selection.

**Figure 2.** Meta-analysis for treatment effect of hemofiltration on (A) mortality within 90 days, (B) ICU mortality, (C) in hospital mortality, (D) length of ICU stay, and (E) length of hospital stay.

**Figure 3.** Sensitivity analysis using leave-one-out approach for the treatment effect of hemofiltration (A) mortality within 90 days, (B) ICU mortality, and (C) in hospital mortality.

**Figure S1.** Quality assessment.

Table 1. Summary of basic characteristics of studies included in the for meta-analysis

| Study                | Study design | Number of patients | Treatment             | Prescribed dose (mL/kg/h) | Delivered dose (mL/kg/h) | Duration (d)                    | Age (y)       | Male (%) | Major cause of AKI | Sepsis      | Oliguria    | Mean APACHE II score |
|----------------------|--------------|--------------------|-----------------------|---------------------------|--------------------------|---------------------------------|---------------|----------|--------------------|-------------|-------------|----------------------|
| Joannes-Boyau (2013) | RCT          | 66                 | High-volume HF        | 70                        | 65.6 (40–67.9)*          | 96 h                            | 68 (58–77)*   | 68.0%    | Sepsis             | 66 (100%)   |             |                      |
|                      |              | 71                 | Standard-volume HF    | 35                        | 33.2 (28.7–33.6)*        |                                 | 70 (58–75)*   | 54.0%    |                    | 71 (100%)   |             |                      |
| Vesconi (2009)       | Prospective  | 75                 | More-intensive        | 35                        | 44.8 (9.4)               | 2 (1–3)*                        | 61.01 (17.4)  | 58.1%    |                    | 33 (40.5%)  | 36 (48.6%)  |                      |
|                      |              | 202                | Less-intensive        | 21-34                     | 26.9 (4.0)               | 4 (2–8)*                        | 63.48 (15.9)  | 67.8%    | Surgery            | 81 (40.1%)  | 84 (41.7%)  |                      |
|                      |              | 61                 | Less-intensive        | 20                        | 15.4 (4.2)               | 3 (2–6)*                        | 59.05 (19.0)  | 73.8%    |                    | 19 (31.2%)  | 30 (49.5%)  |                      |
| Zhang (2012)         | RCT          | 141                | EHVHF                 | 85                        | 87.54 (12.54)            | 9.38 (12.06)                    | 56.62 (16.38) | 58.9%    | Septic shock       | 72 (51.06%) |             | 21.97                |
|                      |              | 139                | HVHF                  | 50                        | 49.99 (9.65)             | 8.88 (10.79)                    | 59.96 (18.81) | 64.0%    |                    | 69 (49.64%) |             | 22.6                 |
| Bouman (2002)        | RCT          | 35                 | EHV                   | 72                        | 48.2 (42.3–58.7)*        | 68.5 (28.0–140.8)* <sup>†</sup> | 68 (13)       | 60.0%    | Cardiac surgery    |             | 35 (100%)   | 23.5                 |
|                      |              | 35                 | ELV                   | 24-36                     | 20.1 (17.5–22.0)*        | 94.0 (53.0–181.5)* <sup>†</sup> | 70 (10)       | 57.0%    |                    | 35 (100%)   | 21.7        |                      |
|                      |              | 36                 | LLV                   | 24-36                     | 19.0 (16.6–21.2)*        | 69.5 (28.3–157.7)* <sup>†</sup> | 67 (13)       | 61.0%    |                    | 30 (100%)   | 23.6        |                      |
| Tolwani (2008)       | RCT          | 100                | High Dosage           | 35                        | 29                       | 10.0 (9.8)                      | 58 (16)       | 59.0%    | Septic shock       | 54 (54%)    | 64 (64%)    | 26                   |
|                      |              | 100                | Standard Dosage       | 20                        | 17                       | 9.7 (11.3)                      | 62 (15)       | 57.0%    |                    | 54 (54%)    | 63 (63%)    | 26                   |
| Bellomo (2009)       | RCT          | 722                | Higher-Intensity CRRT | 40                        | 33.4 (12.8)              | 6.3 (8.7)                       | 64.7(14.5)    | 65.7%    | Sepsis             | 360 (49.9)  | 430 (59.6%) | 102.5 <sup>‡</sup>   |
|                      |              | 743                | Lower-Intensity CRRT  | 25                        | 22 (17.8)                | 5.9 (7.7)                       | 64.4 (15.3)   | 63.5%    |                    | 363 (48.9)  | 444 (59.8%) | 102.3 <sup>‡</sup>   |



|    |          |     |     |      |    |    |           |               |       |         |           |      |
|----|----------|-----|-----|------|----|----|-----------|---------------|-------|---------|-----------|------|
| 1  | Bousseke | RCT | 9   | HVHF | 65 | 62 | 7 (2-17)* | 68 (58-74)*   | 78.0% | Sepsis  | 9 (100 %) | 31   |
| 2  | y (2008) |     |     |      |    |    |           |               |       |         |           |      |
| 3  |          |     | 10  | LVHF | 35 | 32 | 6 (2-14)* | 72.5 (54-77)* | 80.0% |         | 10 (100%) | 33.5 |
| 4  |          |     |     |      |    |    |           |               |       |         |           |      |
| 5  | Ronco    | RCT | 146 |      | 20 |    |           | 61 (10)       | 55.5% |         | 20 (14%)  | 22   |
| 6  | (2000)   |     |     |      |    |    |           |               |       |         |           |      |
| 7  |          |     |     |      |    |    |           |               |       |         |           |      |
| 8  |          |     | 139 |      | 35 |    |           | 59 (9)        | 55.4% | Surgery | 17 (12%)  | 24   |
| 9  |          |     |     |      |    |    |           |               |       |         |           |      |
| 10 |          |     | 140 |      | 45 |    |           | 63 (12)       | 57.1% |         | 15 (11%)  | 22   |
| 11 |          |     |     |      |    |    |           |               |       |         |           |      |

AKI, acute kidney injury; CRRT, continuous renal-replacement therapy; EHV, early high-volume hemofiltration; EHVHF, extra high-volume hemofiltration; ELV, early low-volume hemofiltration; HVHF, high-volume hemofiltration; LLV, late low-volume hemofiltration LVHF, low-volume hemofiltration; RCT, randomized controlled trial.

\*Data were presented by median and inter-quartile range (IQR), and by mean and standard deviation (SD) if not specified.

†Numbers were shown in hours.

‡Measured by APACHE III.

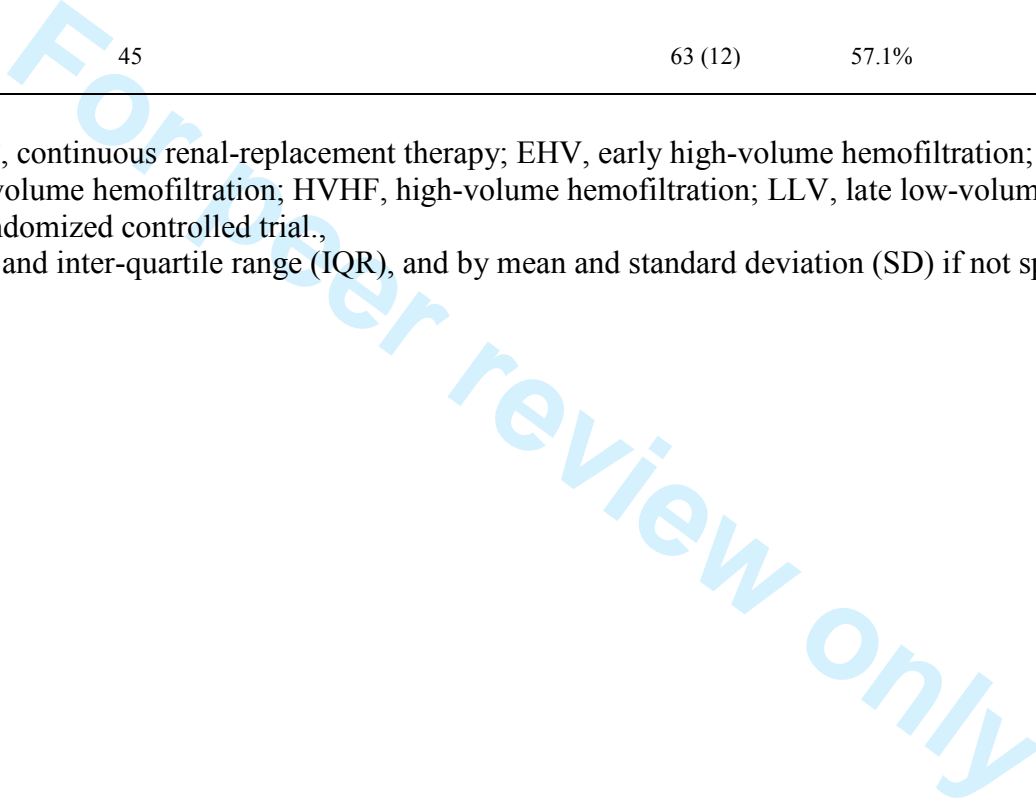

**Table 2. Sensitivity-analysis for treatment effect on mortality according to different cut-off points of prescribed dose and delivered dose**

|                        | Number of studies included | Pooled odds ratio | Lower limit | Upper limit | Z-Value | P-Value |
|------------------------|----------------------------|-------------------|-------------|-------------|---------|---------|
| <b>Prescribed dose</b> |                            |                   |             |             |         |         |
| (A) 90-day mortality   |                            |                   |             |             |         |         |
| 50 mL/kg/h             | 2                          | 0.97              | 0.66        | 1.43        | -0.16   | 0.88    |
| 40 mL/kg/h             | 3                          | 0.83              | 0.50        | 1.38        | -0.71   | 0.48    |
| 30 mL/kg/h             | 2                          | 0.73              | 0.39        | 1.38        | -0.97   | 0.33    |
| (B) ICU mortality      |                            |                   |             |             |         |         |
| 50 mL/kg/h             | 1                          | 1.20              | 0.58        | 2.47        | 0.50    | 0.62    |
| 40 mL/kg/h             | 2                          | 1.04              | 0.85        | 1.28        | 0.37    | 0.72    |
| 30 mL/kg/h             | 3                          | 1.13              | 0.92        | 1.38        | 1.18    | 0.24    |
| (C) Hospital mortality |                            |                   |             |             |         |         |
| 50 mL/kg/h             | 2                          | 1.11              | 0.75        | 1.65        | 0.53    | 0.60    |
| 40 mL/kg/h             | 2                          | 1.02              | 0.71        | 1.45        | 0.08    | 0.94    |
| 30 mL/kg/h             | 2                          | 0.98              | 0.73        | 1.31        | -0.15   | 0.88    |
| <b>Delivered dose</b>  |                            |                   |             |             |         |         |
| (A) 90-day mortality   |                            |                   |             |             |         |         |
| 50 mL/kg/h             | 2                          | 0.97              | 0.66        | 1.43        | -0.16   | 0.88    |
| 40 mL/kg/h             | 1                          | 1.24              | 0.63        | 2.43        | 0.63    | 0.53    |
| 30 mL/kg/h*            | 1                          | 1.00              | 0.81        | 1.23        | -0.03   | 0.97    |
| (B) ICU mortality      |                            |                   |             |             |         |         |
| 50 mL/kg/h             | 1                          | 1.20              | 0.58        | 2.47        | 0.50    | 0.62    |
| 40 mL/kg/h             | 2                          | 1.39              | 0.96        | 2.00        | 1.75    | 0.08    |
| 30 mL/kg/h             | 2                          | 1.16              | 0.84        | 1.62        | 0.90    | 0.37    |

## (C) Hospital mortality

|            |   |      |      |      |       |      |
|------------|---|------|------|------|-------|------|
| 50 mL/kg/h | 1 | 0.99 | 0.61 | 1.61 | -0.03 | 0.98 |
| 40 mL/kg/h | 1 | 1.39 | 0.71 | 2.74 | 0.96  | 0.34 |
| 30 mL/kg/h | 1 | 0.91 | 0.65 | 1.29 | -0.52 | 0.60 |

\*Ronco et al. (2000) did not provide information on delivered dose of continuous renal replacement therapy, and therefore was excluded.

**Table 3. Meta-regression analysis for each outcome**

| <b>Outcome</b>           | <b>Intercept<sup>a</sup></b> | <b>Slope<sup>a</sup></b> |
|--------------------------|------------------------------|--------------------------|
| Mortality within 90 days | -0.42 (0.19)                 | 0.01 (0.004)             |
| ICU mortality            | 0.31 (0.35)                  | -0.004 (0.01)            |
| Hospital mortality       | 0.31 (0.34)                  | -0.01 (0.01)             |
| Length of ICU stay       | -2.89 (1.90)                 | 0.03 (0.04)              |
| Length of hospital stay  | -1.74 (4.13)                 | 0.034 (0.08)             |

<sup>a</sup>Presented as point estimate of coefficient and standard error.

1  
2  
3  
4  
5  
6  
7  
8  
9  
10  
11  
12  
13  
14  
15  
16  
17  
18  
19  
20  
21  
22  
23  
24  
25  
26  
27  
28  
29  
30  
31  
32  
33  
34  
35  
36  
37  
38  
39  
40  
41  
42  
43  
44  
45  
46  
47  
48  
49  
50  
51  
52  
53  
54  
55  
56  
57  
58  
59  
60

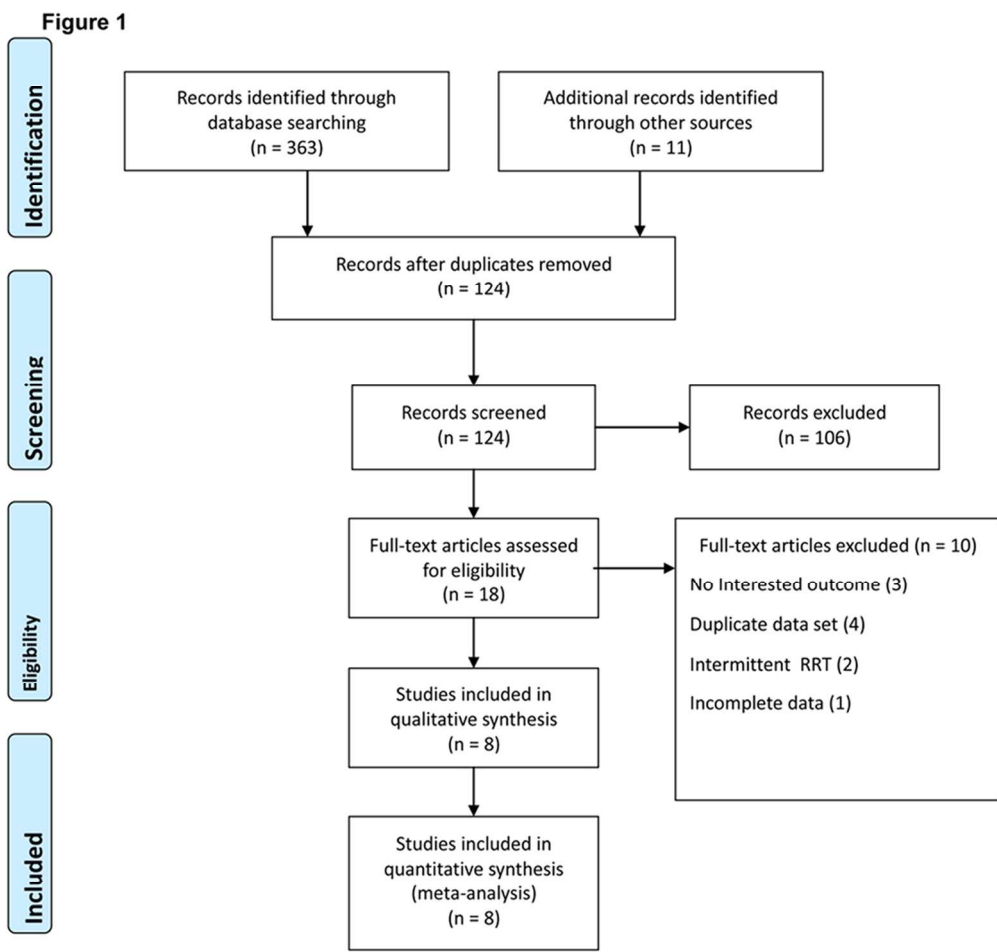

Figure 1

99x99mm (300 x 300 DPI)

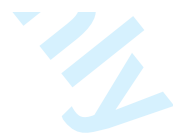

(A) 90-day mortality

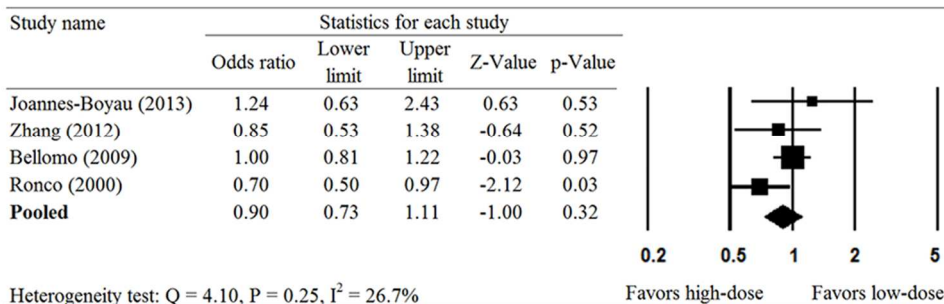

Figure 2A

150x57mm (300 x 300 DPI)

Peer review only

1  
2  
3  
4  
5  
6  
7  
8  
9  
10  
11  
12  
13  
14  
15  
16  
17  
18  
19  
20  
21  
22  
23  
24  
25  
26  
27  
28  
29  
30  
31  
32  
33  
34  
35  
36  
37  
38  
39  
40  
41  
42  
43  
44  
45  
46  
47  
48  
49  
50  
51  
52  
53  
54  
55  
56  
57  
58  
59  
60

1  
2  
3  
4  
5  
6  
7  
8  
9  
10  
11  
12  
13  
14  
15  
16  
17  
18  
19  
20  
21  
22  
23  
24  
25  
26  
27  
28  
29  
30  
31  
32  
33  
34  
35  
36  
37  
38  
39  
40  
41  
42  
43  
44  
45  
46  
47  
48  
49  
50  
51  
52  
53  
54  
55  
56  
57  
58  
59  
60

(B) ICU mortality

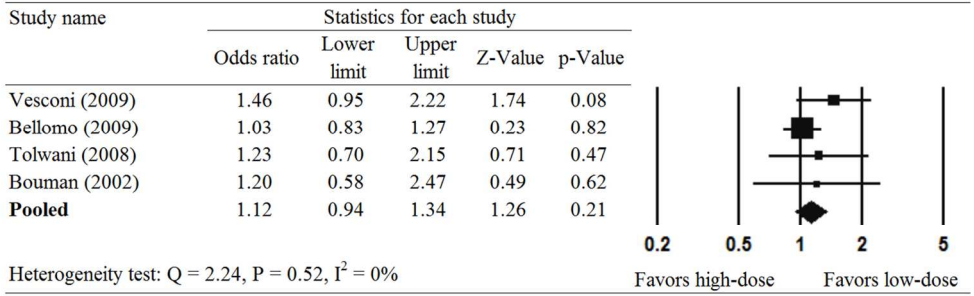

Figure 2B

150x56mm (300 x 300 DPI)

Peer review only

(C) Hospital mortality

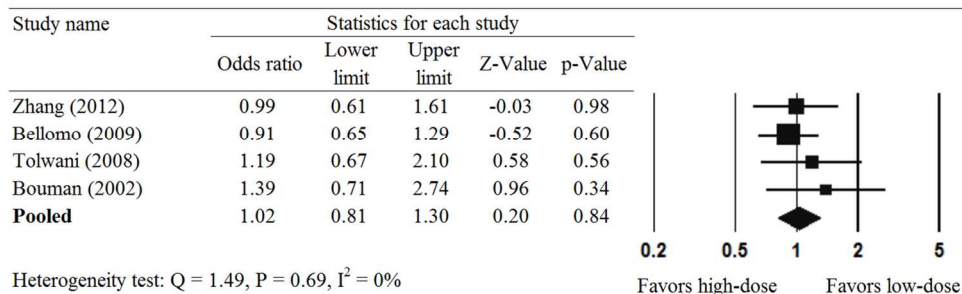

Figure 2C

150x57mm (300 x 300 DPI)

Peer review only



## (D) Length of ICU stay

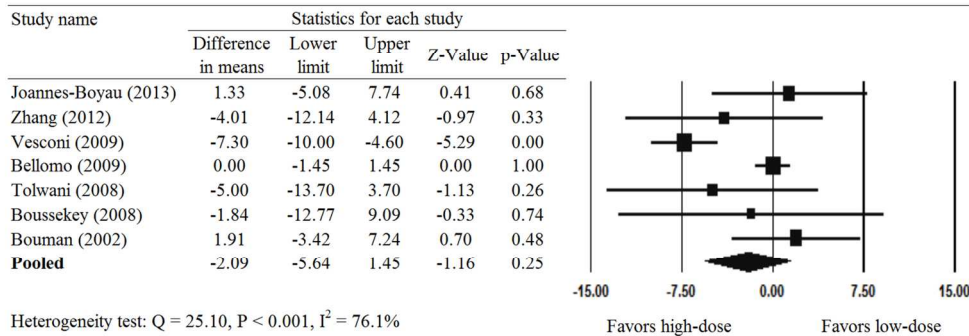

Figure 2D

150x61mm (300 x 300 DPI)

(E) Length of hospital stay

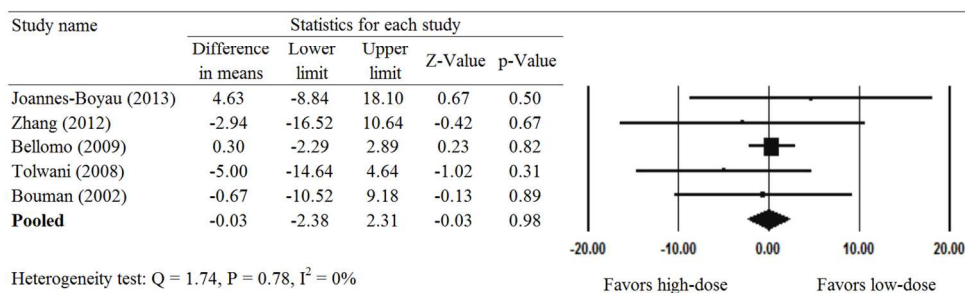

Figure 2E

150x55mm (300 x 300 DPI)

Peer review only

## (A) 90-day mortality

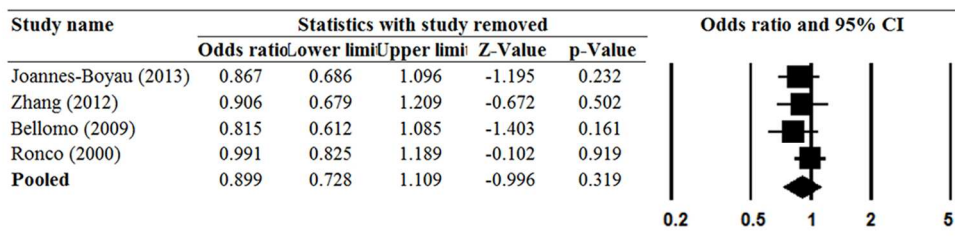

## (B) ICU mortality

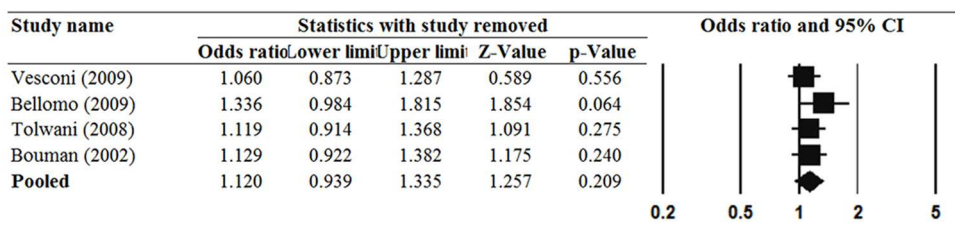

## (C) Hospital mortality

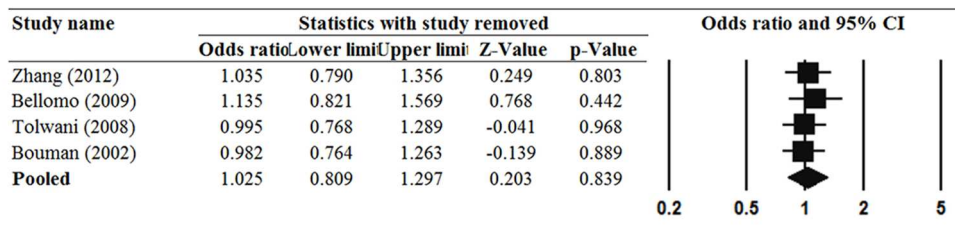

Figure 3

99x103mm (300 x 300 DPI)

Figure S1

(A)

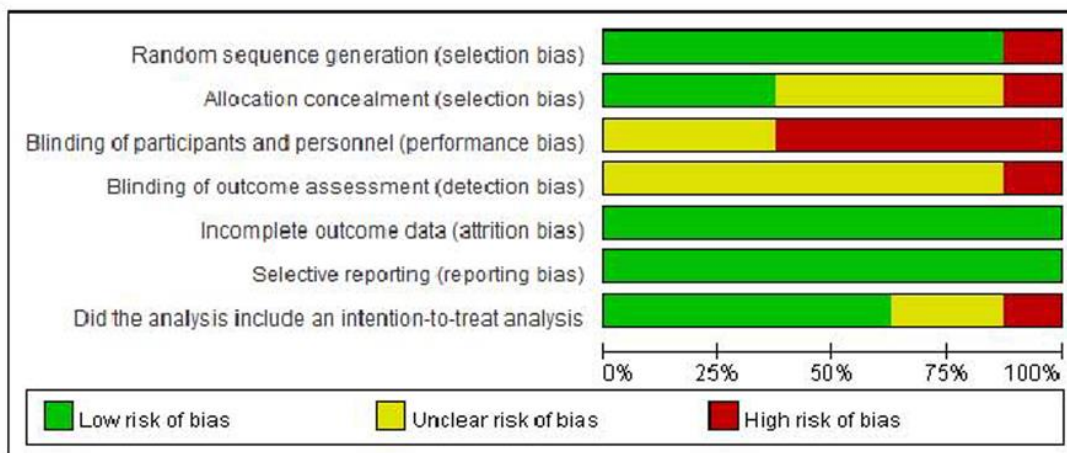

(B)

|                    | Random sequence generation (selection bias) | Allocation concealment (selection bias) | Blinding of participants and personnel (performance bias) | Blinding of outcome assessment (detection bias) | Incomplete outcome data (attrition bias) | Selective reporting (reporting bias) | Did the analysis include an intention-to-treat analysis |
|--------------------|---------------------------------------------|-----------------------------------------|-----------------------------------------------------------|-------------------------------------------------|------------------------------------------|--------------------------------------|---------------------------------------------------------|
| Joannes-Boyau 2013 | +                                           | +                                       | +                                                         | ?                                               | +                                        | +                                    | +                                                       |
| Zhang 2012         | +                                           | ?                                       | ?                                                         | ?                                               | +                                        | +                                    | ?                                                       |
| Vesconi 2009       | +                                           | +                                       | +                                                         | +                                               | +                                        | +                                    | ?                                                       |
| Bellomo 2009       | +                                           | +                                       | +                                                         | ?                                               | +                                        | +                                    | +                                                       |
| Tolwani 2008       | +                                           | +                                       | +                                                         | ?                                               | +                                        | +                                    | +                                                       |
| Boussekey 2008     | +                                           | ?                                       | +                                                         | ?                                               | +                                        | +                                    | +                                                       |
| Bouman 2002        | +                                           | ?                                       | ?                                                         | ?                                               | +                                        | +                                    | +                                                       |
| Ronco 2000         | +                                           | ?                                       | ?                                                         | ?                                               | +                                        | +                                    | +                                                       |

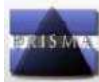

# PRISMA 2009 Checklist

| Section/Topic                      | #  | Checklist Item                                                                                                                                                                                                                                                                                              | Reported on Page # |
|------------------------------------|----|-------------------------------------------------------------------------------------------------------------------------------------------------------------------------------------------------------------------------------------------------------------------------------------------------------------|--------------------|
| <b>TITLE</b>                       |    |                                                                                                                                                                                                                                                                                                             |                    |
| Title                              | 1  | Identify the report as a systematic review, meta-analysis, or both.                                                                                                                                                                                                                                         | 1                  |
| <b>ABSTRACT</b>                    |    |                                                                                                                                                                                                                                                                                                             |                    |
| Structured summary                 | 2  | Provide a structured summary including, as applicable: background; objectives; data sources; study eligibility criteria, participants, and interventions; study appraisal and synthesis methods; results; limitations; conclusions and implications of key findings; systematic review registration number. | 3                  |
| <b>INTRODUCTION</b>                |    |                                                                                                                                                                                                                                                                                                             |                    |
| Rationale                          | 3  | Describe the rationale for the review in the context of what is already known.                                                                                                                                                                                                                              | 5-6                |
| Objectives                         | 4  | Provide an explicit statement of questions being addressed with reference to participants, interventions, comparisons, outcomes, and study design (PICOS).                                                                                                                                                  | 6                  |
| <b>METHODS</b>                     |    |                                                                                                                                                                                                                                                                                                             |                    |
| Protocol and registration          | 5  | Indicate if a review protocol exists, if and where it can be accessed (e.g., Web address), and, if available, provide registration information including registration number.                                                                                                                               |                    |
| Eligibility criteria               | 6  | Specify study characteristics (e.g., PICOS, length of follow-up) and report characteristics (e.g., years considered, language, publication status) used as criteria for eligibility, giving rationale.                                                                                                      | 6-7                |
| Information sources                | 7  | Describe all information sources (e.g., databases with dates of coverage, contact with study authors to identify additional studies) in the search and date last searched.                                                                                                                                  | 6-7                |
| Search                             | 8  | Present full electronic search strategy for at least one database, including any limits used, such that it could be repeated.                                                                                                                                                                               |                    |
| Study selection                    | 9  | State the process for selecting studies (i.e., screening, eligibility, included in systematic review, and, if applicable, included in the meta-analysis).                                                                                                                                                   | 7                  |
| Data collection process            | 10 | Describe method of data extraction from reports (e.g., piloted forms, independently, in duplicate) and any processes for obtaining and confirming data from investigators.                                                                                                                                  | 7                  |
| Data items                         | 11 | List and define all variables for which data were sought (e.g., PICOS, funding sources) and any assumptions and simplifications made.                                                                                                                                                                       | 7                  |
| Risk of bias in individual studies | 12 | Describe methods used for assessing risk of bias of individual studies (including specification of whether this was done at the study or outcome level), and how this information is to be used in any data synthesis.                                                                                      | 7                  |
| Summary measures                   | 13 | State the principal summary measures (e.g., risk ratio, difference in means).                                                                                                                                                                                                                               | 8                  |
| Synthesis of results               | 14 | Describe the methods of handling data and combining results of studies, if done, including measures of consistency (e.g., $I^2$ for each meta-analysis).                                                                                                                                                    | 8                  |

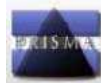

# PRISMA 2009 Checklist

Page 1 of 2

| Section/Topic                 | #  | Checklist Item                                                                                                                                                                                           | Reported on Page # |
|-------------------------------|----|----------------------------------------------------------------------------------------------------------------------------------------------------------------------------------------------------------|--------------------|
| Risk of bias across studies   | 15 | Specify any assessment of risk of bias that may affect the cumulative evidence (e.g., publication bias, selective reporting within studies).                                                             |                    |
| Additional analyses           | 16 | Describe methods of additional analyses (e.g., sensitivity or subgroup analyses, meta-regression), if done, indicating which were pre-specified.                                                         | 8-9                |
| <b>RESULTS</b>                |    |                                                                                                                                                                                                          |                    |
| Study selection               | 17 | Give numbers of studies screened, assessed for eligibility, and included in the review, with reasons for exclusions at each stage, ideally with a flow diagram.                                          | 9                  |
| Study characteristics         | 18 | For each study, present characteristics for which data were extracted (e.g., study size, PICOS, follow-up period) and provide the citations.                                                             | 9                  |
| Risk of bias within studies   | 19 | Present data on risk of bias of each study and, if available, any outcome level assessment (see item 12).                                                                                                | 12                 |
| Results of individual studies | 20 | For all outcomes considered (benefits or harms), present, for each study: (a) simple summary data for each intervention group (b) effect estimates and confidence intervals, ideally with a forest plot. |                    |
| Synthesis of results          | 21 | Present the main results of the review. If meta-analyses done, include for each, confidence intervals and measures of consistency.                                                                       | 10-11              |
| Risk of bias across studies   | 22 | Present results of any assessment of risk of bias across studies (see Item 15).                                                                                                                          |                    |
| Additional analysis           | 23 | Give results of additional analyses, if done (e.g., sensitivity or subgroup analyses, meta-regression [see Item 16]).                                                                                    | 11                 |
| <b>DISCUSSION</b>             |    |                                                                                                                                                                                                          |                    |
| Summary of evidence           | 24 | Summarize the main findings including the strength of evidence for each main outcome; consider their relevance to key groups (e.g., healthcare providers, users, and policy makers).                     | 12-15              |
| Limitations                   | 25 | Discuss limitations at study and outcome level (e.g., risk of bias), and at review-level (e.g., incomplete retrieval of identified research, reporting bias).                                            | 15-16              |
| Conclusions                   | 26 | Provide a general interpretation of the results in the context of other evidence, and implications for future research.                                                                                  | 16                 |
| <b>FUNDING</b>                |    |                                                                                                                                                                                                          |                    |
| Funding                       | 27 | Describe sources of funding for the systematic review and other support (e.g., supply of data); role of funders for the systematic review.                                                               | 16                 |

From: Moher D, Liberati A, Tetzlaff J, Altman DG, The PRISMA Group (2009). Preferred Reporting Items for Systematic Reviews and Meta-Analyses: The PRISMA Statement. PLoS Med 6(6): e1000097. doi:10.1371/journal.pmed1000097

For more information, visit: [www.prisma-statement.org](http://www.prisma-statement.org).

For peer review only - <http://bmjopen.bmj.com/site/about/guidelines.xhtml>



# PRISMA 2009 Checklist

- 1
- 2
- 3
- 4
- 5
- 6
- 7
- 8
- 9
- 10
- 11
- 12
- 13
- 14
- 15
- 16
- 17
- 18
- 19
- 20
- 21
- 22
- 23
- 24
- 25
- 26
- 27
- 28
- 29
- 30
- 31
- 32
- 33
- 34
- 35
- 36
- 37
- 38
- 39
- 40
- 41
- 42
- 43
- 44
- 45
- 46
- 47
- 48
- 49

For peer review only
