# Supplementary material for: High-dose versus low-dose haemofiltration for the treatment of critically ill patients with acute kidney injury: an updated systematic review and meta-analysis
Source: PubMed Central journal article supplement — BMJ Open. 2017 Oct 22;7(10):e014171. doi: 10.1136/bmjopen-2016-014171 (PMC5665234; doi:10.1136/bmjopen-2016-014171), 2017-10-22
Supplement: bmjopen-2016-014171supp001.pdf [file bmjopen-2016-014171supp001.pdf]

Figure S1

(A)

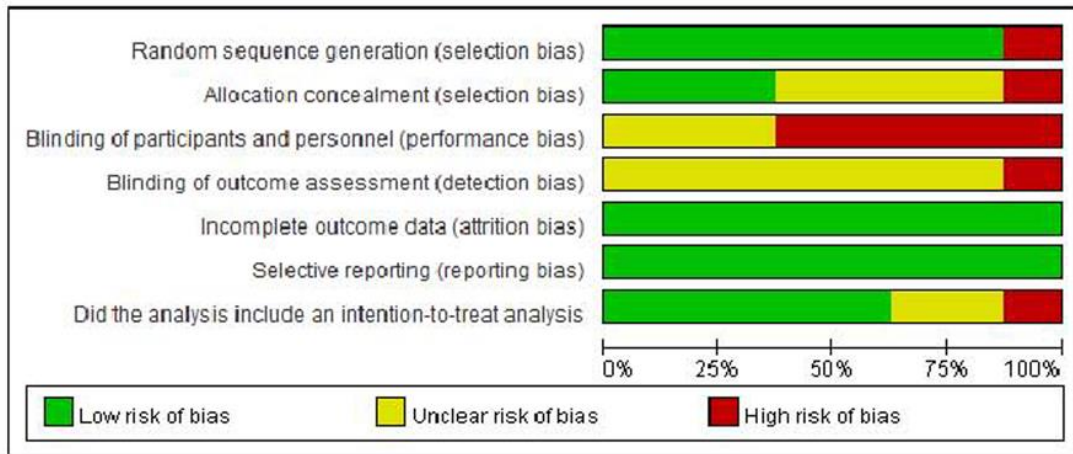

(B)

|                    | Random sequence generation (selection bias) | Allocation concealment (selection bias) | Blinding of participants and personnel (performance bias) | Blinding of outcome assessment (detection bias) | Incomplete outcome data (attrition bias) | Selective reporting (reporting bias) | Did the analysis include an intention-to-treat analysis |
|--------------------|---------------------------------------------|-----------------------------------------|-----------------------------------------------------------|-------------------------------------------------|------------------------------------------|--------------------------------------|---------------------------------------------------------|
| Joannes-Boyau 2013 | +                                           | +                                       | ●                                                         | ?                                               | +                                        | +                                    | +                                                       |
| Zhang 2012         | +                                           | ?                                       | ?                                                         | ?                                               | +                                        | +                                    | ?                                                       |
| Vesconi 2009       | ●                                           | ●                                       | ●                                                         | ●                                               | +                                        | +                                    | ?                                                       |
| Bellomo 2009       | +                                           | +                                       | ●                                                         | ?                                               | +                                        | +                                    | +                                                       |
| Tolwani 2008       | +                                           | +                                       | ●                                                         | ?                                               | +                                        | +                                    | +                                                       |
| Boussekey 2008     | +                                           | ?                                       | ●                                                         | ?                                               | +                                        | +                                    | ●                                                       |
| Bouman 2002        | +                                           | ?                                       | ?                                                         | ?                                               | +                                        | +                                    | +                                                       |
| Ronco 2000         | +                                           | ?                                       | ?                                                         | ?                                               | +                                        | +                                    | +                                                       |
